# Supplementary material for: Association of Exposure to Civil Conflict With Maternal Resilience and Maternal and Child Health and Health System Performance in Afghanistan
Source: PubMed Central journal article supplement (PMC6902774; doi:10.1001/jamanetworkopen.2019.14819), 2019-11-08
Supplement: jamanetwopen-2-e1914819-s001.pdf [file jamanetwopen-2-e1914819-s001.pdf]

## Supplementary Online Content

Akseer N, Rizvi A, Bhatti Z, et al. Association of exposure to civil conflict with maternal resilience and maternal and child health and health system performance in Afghanistan. *JAMA Netw Open*. 2019;2(11):e1914819. doi:10.1001/jamanetworkopen.2019.14819

**eMethods 1.** Evolution of NGO Contracting Models for Health Service Delivery in Afghanistan

**eMethods 2.** Overview of Conflict Classification and Stepwise Modeling Approach

**eTable 1.** Survey Sample Sizes

**eTable 2.** Overview of Data Sources Used for Each of Our Analyses

**eTable 3.** Reproductive, Maternal, Newborn and Child Health (RMNCH) Intervention Definitions

**eTable 4.** Health Systems Performance Domains and Indicators

**eTable 5.** Battle-Related Deaths (BRDs) by Province, 2003-2017

**eTable 6.** Crude and Multivariable Analysis of Conflict Association With RMNCH Coverage

**eTable 7.** RMNCH Interventions Coverage by Conflict Status

**eTable 8.** Adjusted Percentage Point Change in Key RMNCH Interventions by Conflict Status During 2003-2018 and 2010-2018

**eTable 9.** Health Systems Composite Indicators by Conflict Status

**eTable 10.** Crude and Multivariable Analysis of Conflict Association With Health Systems Indicators

**eFigure 1.** Average Annual Percentage Point Change in Composite Coverage Index vs Conflict by Province

**eFigure 2.** Crude and Multivariable Analysis of Conflict Association With RMNCH Coverage

**eFigure 3.** Health System Overall Mean Scores and Change by Province

**eFigure 4.** Average Annual Percentage Point Change in Overall Health Systems Performance vs Conflict by Province

**eFigure 5.** Crude and Multivariable Analysis of Conflict Association With Health Systems Indicators

**eReferences.**

This supplementary material has been provided by the authors to give readers additional information about their work.

## **eMethods 1. Evolution of NGO Contracting Models for Health Service Delivery in Afghanistan**

### **History and Rationale for Introducing Contracting Mechanisms**

After decades of war, Afghanistan had virtually no health system and infrastructure. An effective and rapid approach was needed to scale up service delivery throughout the country, and specifically hard to reach areas. NGOs had a strong presence throughout the nation, and were keen and equipped with capacity, infrastructure and personnel to fill the gap. In consultation with development partners and key funders, the Afghan Ministry of Public Health (MoPH) adapted an NGO contracting mechanism to rapidly deliver the basic package of health services (BPHS) nationwide [10-12].

### **Evolution of the Contracting Models: Contracting In vs Contracting Out**

Since 2003, the MOPH contracted well-established NGOs to deliver the services BPHS in a defined geographic area, which in most cases was a province. This process of “contracting-out” service delivery contracts to NGOs was implemented in 31 of 34 provinces. The MoPH was involved in selecting the NGOs through a competitive bid process, managing the contracts, and monitoring and evaluating performance. The contracts ranged from 12 to 36 months and NGOs were paid according to budgets that they submitted as part of their bids; full payment depended on achievement of agreed-on goals. Early on, NGOs were largely international, though over time, an increasing majority of contracts were awarded to Afghan NGOs. In 3 provinces (Parwan, Panjsher, Kapisa), the MoPH approach for service delivery was “contracting in” or recruiting managers to strengthen the existing MoPH. Coined the strengthening mechanism, this approach was designed to build capacity and strengthen service delivery in government facilities [10, 11].

### **The Essential Package of Hospital Services and Benefits Package**

The Essential Package of Hospital Services (EPHS) was implemented in 2005 and was designed to complement the BPHS by specifying the in-patient clinical and ancillary services and defining staffing, equipment and drugs for the three types of hospitals: district, provincial and national. The link between the BPHS and EPHS health services is the district hospital, which serves as the first referral-level hospital for primary care facilities. With the two packages, the MOPH specified all the services, staffing and equipment expected at every level of the Afghan health system [10].

## eMethods 2. Overview of Conflict Classification and Stepwise Modeling Approach

### Conflict classification

Consultations with country experts confirmed that the classifications using only BRDs most accurately reflected province-level conflict severity. We explored BRD classifications based on death counts and rates (total deaths/100,000 population) for 3 and 5 year periods. For sensitivity analyses, the province conflict ranking and all conflict-stratified analyses were compared using each categorization. Though some variation was noted in the provinces' conflict categorization, using count- vs rate-based conflict classification did not substantially change our effect estimates or inferences. We thus proceeded with classification based on counts since it's the recommended approach by Uppsala and conflict severity were most closely aligned with realities on the ground.

### Step-wise multivariable linear regression approach

To examine the association between conflict and child nutrition outcomes, we conducted a series of step-wise multivariable linear regression models using district-level (n=399) data. District-level child undernutrition outcomes (wasting, stunting, underweight, stunting & wasting) were obtained from Akseer et al 2018's Bayesian geospatial analysis of NNS 2013 data <sup>1</sup>. Conflict was measured using 4-year battle-related death totals for each district with a log transformation to account for right skewness. The 4-year lag period (2010-2013) was selected to align NNS 2013 anthropometry data with an appropriate conflict exposure period and potential impact on child growth and adverse nutrition outcomes <sup>2</sup>. Analyses were conducted in 3 stages (models) using ordinary least squares (OLS) regression, adjusting for potential sources of confounding related to nutritional outcomes <sup>3</sup>. Model 1 was simple crude associations between the exposure and outcome variables. Model 2 included model 1 + adjustments for household poverty (% population in the poorest 2 quintiles) and maternal illiteracy. Model 3 included model 2 + adjustments for household lack of access to improved water and sanitation sources. At each step, the crude and adjusted association between the conflict exposure and outcome was analyzed for statistical significance. Multicollinearity among adjustment variables was evaluated using variance inflation factors (VIF) where VIF>3 were considered suspect for collinearity. Model diagnostics such as graphical conditional studentized residuals and fixed effect influence statistics were accessed to assess model fit. Model parameters ( $\beta$ ) were estimated with 95% confidence intervals and standardized  $\beta$ s were estimated to determine relative ranking (importance) of model covariables to each outcomes. Statistical significance was established at  $p<0.05$  and SAS v 9.4 was used for analysis.

**eTable 1. Survey Sample Sizes**

| Survey       | Under-5<br>Sample Size | Women age 15-49 years<br>Sample Size |
|--------------|------------------------|--------------------------------------|
| MICS 2003/04 | 25,777                 | 21,677                               |
| MICS 2010/11 | 15,320                 | 22,052                               |
| NNS 2013     | 24,348                 | 26,901                               |
| AHS 2018     | 23,133                 | 21,096*                              |

Abbreviations: AHS: Afghanistan Health Survey, MICS: Multiple Indicator Cluster Survey, NNS: National Nutrition Survey.

\*women were defined as 12-49 years

**eTable 2. Overview of Data Sources Used for Each of Our Analyses**

| <b>Outcome(s)</b>         | <b>Data Source(s)</b>                                                                              | <b>Analytical Strategy</b>                                                                                   |
|---------------------------|----------------------------------------------------------------------------------------------------|--------------------------------------------------------------------------------------------------------------|
| Child anthropometry       | Afghanistan National Nutrition Survey (NNS) 2013 / Akseer et al. (2018)                            | Hierarchical multivariable linear regression models using district-level (n=399) data                        |
| RMNCH                     | Multiple Indicator Cluster Surveys (MICS) 2004, MICS 2010-11, Afghanistan Health Survey (AHS) 2018 | Difference-in-difference (DID) analysis using generalized linear models and generalized estimating equations |
| Health system performance | Afghanistan Balanced Scorecards (BSC) 2004-2016                                                    | Difference-in-difference (DID) analysis using generalized linear models and generalized estimating equations |

**eTable 3. Reproductive, Maternal, Newborn and Child Health (RMNCH) Intervention Definitions**

| <b>Indicator</b>                                                  | <b>Definition</b>                                                                                                    |
|-------------------------------------------------------------------|----------------------------------------------------------------------------------------------------------------------|
| Current use of contraceptives (any method) (CPU)                  | Prevalence of current contraceptive use among married women 15-49 years old, any method                              |
| Current use of contraceptives (any modern method) (CPUM)          | Prevalence of current contraceptive use among married women 15-49 years old, any modern method                       |
| At least one antenatal care (ANC) checkup from a skilled provider | Percentage of women attended at least once during pregnancy by skilled health personnel                              |
| Skilled birth attendance (SBA) at last delivery                   | Percentage of live births attended by skilled health personnel                                                       |
| Facility births                                                   | Percentage of births delivered in a health facility                                                                  |
| BCG vaccination (BCG)                                             | The percentage of children aged 12-23 months who have received at least one dose of Bacillus Calmette-Guérin vaccine |

|                                                    |                                                                                                                                                                                                                                                                                                                                                                                                                                       |
|----------------------------------------------------|---------------------------------------------------------------------------------------------------------------------------------------------------------------------------------------------------------------------------------------------------------------------------------------------------------------------------------------------------------------------------------------------------------------------------------------|
| DPT3/Penta 3 vaccination (DPT3)                    | The percentage of one-year-olds who have received three doses of the combined diphtheria, tetanus toxoid and pertussis (DTP3) vaccine in a given year                                                                                                                                                                                                                                                                                 |
| Measles vaccination (MSL)                          | The percentage of children aged 12-23 months who have received at least one dose of measles-containing vaccine in a given year                                                                                                                                                                                                                                                                                                        |
| Care seeking for Acute Respiratory Infection (ARI) | Percentage of children under age five with symptoms of acute respiratory illness (ARI) during the two-week period before the survey and, among children with symptoms of ARI, the percentage who were taken to an appropriate health provider                                                                                                                                                                                         |
| Oral Rehydration Therapy (ORT) use for diarrhea    | Percentage of children under age five ill with diarrhea during the two-week period before the survey and, among children ill with diarrhea, the percentage who received Oral Rehydration Solution (ORS) (ORS packet or pre-packaged ORS fluid)                                                                                                                                                                                        |
| Composite Coverage Index (CCI)                     | <p>The CCI is a weighted average of 8 core indicators: demand for family planning satisfied, ANC 1+ visit, skilled birth attendance, BCG vaccine, 3 doses of DPT vaccine, measles vaccination, oral rehydration with continued feeding for diarrhea treatment, and care seeking for acute respiratory infection</p> $CCI = \frac{1}{4} \left( FPS + \frac{SBA + ANC}{2} + \frac{2 DPT3 + MSL + BCG}{4} + \frac{ORT + ARI}{2} \right)$ |

**eTable 4. Health Systems Performance Domains and Indicators**

Note: All domains and indicators measured as percentages ranging from 0-100 where higher values indicate better performance.

| Domain                                  | Definition                                                                                                                                                                                                                                                                                                        |
|-----------------------------------------|-------------------------------------------------------------------------------------------------------------------------------------------------------------------------------------------------------------------------------------------------------------------------------------------------------------------|
| Domain A: Client and community feedback | A composite score examining viewpoints of clients of BPHS facilities and community members on overall client satisfaction, perceived quality of care and community involvement in decision-making.                                                                                                                |
| Domain B: Human resource                | A composite score documenting experience of BPHS facility employees on health worker satisfaction, motivation, salary, staffing, provider knowledge and staff training.                                                                                                                                           |
| Domain C: Physical capacity             | A composite score measuring the BPHS facility's capacity to provide health care in the following areas: equipment functionality, pharmaceuticals and vaccine availability, laboratory functionality, existence of clinical guidelines, and physical infrastructure (e.g. heat, water, etc).                       |
| Domain D: Quality of service provision  | A composite score measuring the technical aspects of service delivery and the patient-provider interaction through examining appropriateness of: client background and physical assessment, patient counseling, precautions and safety measures to prevent infection and injury, and time spent with the patient. |
| Domain E: Management systems            | A composite score that measures functions related to the management of health facilities including use of health management information systems (HMIS), financial systems, and facility management functionality.                                                                                                 |
| Domain F: Overall mission               | A composite score that measures the extent to which the facility promotes greater access to health care for females and the poor.                                                                                                                                                                                 |
| Overall means                           | An overall ranking of health systems performance based on above domains.                                                                                                                                                                                                                                          |

|                             |                                                                                                                                                                                                                                                                                                                                                                                                                                                                                                                                  |
|-----------------------------|----------------------------------------------------------------------------------------------------------------------------------------------------------------------------------------------------------------------------------------------------------------------------------------------------------------------------------------------------------------------------------------------------------------------------------------------------------------------------------------------------------------------------------|
| Select component indicators | <ul style="list-style-type: none"><li>• Equipment functionality index</li><li>• Drug availability index (post-2010: Pharmaceuticals and vaccines availability index)</li><li>• Infrastructure index (post-2010: Functional infrastructure index)</li><li>• Patient history and physical examination index (post-2010: Client background and physical assessment index)</li><li>• Patient counseling index (post-2010: Client counseling index)</li><li>• Female health worker index</li><li>• Provider knowledge score</li></ul> |
|-----------------------------|----------------------------------------------------------------------------------------------------------------------------------------------------------------------------------------------------------------------------------------------------------------------------------------------------------------------------------------------------------------------------------------------------------------------------------------------------------------------------------------------------------------------------------|

**eTable 5. Battle-Related Deaths (BRDs) by Province, 2003-2017**

| Province   | 2003 | 2004 | 2005 | 2006 | 2007 | 2008 | 2009 | 2010 | 2011 | 2012 | 2013 | 2014 | 2015 | 2016 | 2017 |
|------------|------|------|------|------|------|------|------|------|------|------|------|------|------|------|------|
| Badakhshan | 0    | 0    | 0    | 0    | 12   | 0    | 5    | 19   | 32   | 131  | 338  | 234  | 561  | 375  | 383  |
| Badghis    | 57   | 5    | 0    | 8    | 124  | 117  | 242  | 257  | 140  | 129  | 150  | 58   | 157  | 209  | 316  |
| Baghlan    | 0    | 0    | 0    | 1    | 12   | 11   | 106  | 411  | 128  | 111  | 175  | 114  | 291  | 636  | 375  |
| Balkh      | 84   | 7    | 0    | 4    | 1    | 0    | 16   | 33   | 89   | 76   | 53   | 131  | 61   | 199  | 285  |
| Bamyan     | 0    | 0    | 0    | 0    | 0    | 0    | 0    | 1    | 4    | 22   | 0    | 0    | 0    | 1    | 7    |
| Daykundi   | 0    | 0    | 18   | 2    | 0    | 0    | 0    | 49   | 33   | 1    | 11   | 9    | 2    | 1    | 2    |
| Farah      | 0    | 13   | 9    | 64   | 343  | 245  | 426  | 136  | 174  | 359  | 340  | 247  | 391  | 621  | 633  |
| Faryab     | 26   | 0    | 1    | 0    | 0    | 11   | 27   | 91   | 184  | 245  | 250  | 244  | 454  | 499  | 894  |
| Ghazni     | 24   | 15   | 39   | 193  | 426  | 393  | 277  | 294  | 357  | 369  | 588  | 805  | 707  | 1287 | 913  |
| Ghor       | 0    | 0    | 0    | 2    | 0    | 12   | 39   | 22   | 11   | 80   | 33   | 113  | 221  | 188  | 166  |
| Hilmand    | 40   | 84   | 248  | 1316 | 2123 | 1320 | 1205 | 1316 | 1024 | 1097 | 1038 | 1272 | 2516 | 2961 | 2250 |
| Hirat      | 1    | 42   | 4    | 74   | 169  | 133  | 189  | 151  | 210  | 167  | 298  | 370  | 417  | 498  | 451  |
| Jawzjan    | 3    | 0    | 0    | 0    | 0    | 1    | 26   | 26   | 115  | 42   | 107  | 78   | 171  | 370  | 497  |
| Kabul      | 6    | 8    | 14   | 74   | 142  | 160  | 145  | 133  | 193  | 242  | 169  | 239  | 239  | 431  | 448  |
| Kandahar   | 215  | 175  | 378  | 1444 | 1197 | 843  | 680  | 769  | 606  | 641  | 525  | 550  | 787  | 950  | 1330 |
| Kapisa     | 0    | 0    | 0    | 13   | 67   | 110  | 82   | 71   | 127  | 128  | 125  | 55   | 180  | 76   | 236  |
| Khost      | 41   | 50   | 58   | 118  | 89   | 291  | 342  | 298  | 206  | 240  | 78   | 205  | 214  | 194  | 162  |
| Kunar      | 4    | 39   | 103  | 138  | 178  | 156  | 211  | 501  | 730  | 361  | 348  | 639  | 317  | 290  | 217  |
| Kunduz     | 0    | 0    | 0    | 0    | 35   | 16   | 453  | 507  | 199  | 199  | 259  | 464  | 1755 | 1541 | 1217 |
| Laghman    | 0    | 1    | 29   | 24   | 17   | 42   | 98   | 68   | 117  | 188  | 151  | 221  | 179  | 136  | 414  |
| Logar      | 11   | 0    | 12   | 4    | 29   | 34   | 134  | 88   | 206  | 301  | 368  | 323  | 349  | 211  | 364  |
| Nangarhar  | 4    | 9    | 6    | 28   | 53   | 123  | 97   | 260  | 367  | 383  | 572  | 749  | 1514 | 2980 | 2872 |
| Nimroz     | 5    | 15   | 2    | 44   | 41   | 176  | 108  | 163  | 118  | 128  | 67   | 92   | 97   | 71   | 88   |
| Nuristan   | 1    | 3    | 12   | 62   | 92   | 36   | 235  | 130  | 292  | 124  | 84   | 91   | 108  | 41   | 222  |
| Paktika    | 75   | 10   | 112  | 255  | 382  | 252  | 251  | 302  | 448  | 229  | 153  | 261  | 374  | 414  | 516  |
| Paktya     | 8    | 3    | 17   | 52   | 131  | 160  | 136  | 219  | 197  | 212  | 233  | 219  | 143  | 494  | 443  |
| Panjsher   | 0    | 0    | 0    | 0    | 0    | 0    | 1    | 0    | 7    | 0    | 11   | 0    | 0    | 0    | 0    |
| Parwan     | 0    | 0    | 0    | 3    | 24   | 10   | 11   | 19   | 79   | 40   | 75   | 91   | 58   | 74   | 93   |
| Samangan   | 25   | 0    | 0    | 0    | 0    | 0    | 3    | 0    | 2    | 33   | 3    | 11   | 34   | 35   | 19   |
| Sari Pul   | 79   | 0    | 0    | 0    | 0    | 0    | 0    | 11   | 64   | 65   | 70   | 137  | 226  | 306  | 340  |
| Takhar     | 0    | 0    | 4    | 0    | 0    | 1    | 13   | 110  | 55   | 18   | 8    | 68   | 213  | 211  | 243  |
| Uruzgan    | 93   | 118  | 286  | 740  | 791  | 473  | 397  | 257  | 186  | 233  | 266  | 207  | 592  | 1056 | 1239 |
| Wardak     | 0    | 0    | 2    | 16   | 79   | 119  | 131  | 147  | 306  | 298  | 251  | 326  | 224  | 154  | 269  |



| Province | 2003 | 2004 | 2005 | 2006 | 2007 | 2008 | 2009 | 2010 | 2011 | 2012 | 2013 | 2014 | 2015 | 2016 | 2017 |
|----------|------|------|------|------|------|------|------|------|------|------|------|------|------|------|------|
| Zabul    | 140  | 219  | 345  | 297  | 437  | 398  | 361  | 235  | 189  | 168  | 184  | 257  | 459  | 203  | 407  |

**eTable 6. Crude and Multivariable Analysis of Conflict Association With RMNCH Coverage**

**A, 2003-2010**

|                             | Bivariate    |                |                | Main Effect model w/o covariates |               |                | Adjusted     |                |                |
|-----------------------------|--------------|----------------|----------------|----------------------------------|---------------|----------------|--------------|----------------|----------------|
|                             | <i>Coef.</i> | <i>95% CI</i>  | <i>p-value</i> | <i>Coef.</i>                     | <i>95% CI</i> | <i>p-value</i> | <i>Coef.</i> | <i>95% CI</i>  | <i>p-value</i> |
| Skilled birth attendance    |              |                |                |                                  |               |                |              |                |                |
| <b>Conflict Type</b>        |              |                |                |                                  |               |                |              |                |                |
| 0=Minimal                   | ref.         |                |                |                                  |               |                | ref.         |                |                |
| 1=Moderate                  | 0.57         | (0.37,0.77)    | <.0001         | -1.27                            | (-1.82,-0.71) | <.0001         | -0.89        | (-1.35, -0.43) | <.0001         |
| 2=Severe                    | -0.21        | (-0.63,0.20)   | 0.314          | -1.21                            | (-2.32,-0.11) | 0.031          | -1.35        | (-2.54, -0.16) | 0.026          |
| <b>Year</b>                 | 1.32         | (1.09,1.55)    | <.0001         | 1.01                             | (0.74,1.28)   | <.0001         | 1.32         | (1.08, 1.56)   | <.0001         |
| <b>Conflict Type 1*time</b> | --           |                |                | 0.84                             | (0.47,1.21)   | <.0001         | 0.53         | (0.20, 0.86)   | 0.002          |
| <b>Conflict Type 2*time</b> | --           |                |                | 0.41                             | (-0.33,1.14)  | 0.278          | 0.43         | (-0.38, 1.24)  | 0.294          |
| % Women illiterate          | -1.93        | (-2.14, -1.72) | <.0001         |                                  |               |                | -1.18        | (-1.37, -0.98) | <.0001         |
| Contracting type            | 0.34         | (-0.03,0.71)   | 0.069          |                                  |               |                | -0.11        | (-0.44, 0.23)  | 0.537          |
| Rural population            | -2.00        | (-2.22,-1.79)  | <.0001         |                                  |               |                | -2.00        | (-2.23, -1.78) | 0.150          |

|                             | Bivariate    |               |                | Main Effect model w/o covariates |               |                | Adjusted     |                |                |
|-----------------------------|--------------|---------------|----------------|----------------------------------|---------------|----------------|--------------|----------------|----------------|
|                             | <i>Coef.</i> | <i>95% CI</i> | <i>p-value</i> | <i>Coef.</i>                     | <i>95% CI</i> | <i>p-value</i> | <i>Coef.</i> | <i>95% CI</i>  | <i>p-value</i> |
| Measles vaccination         |              |               |                |                                  |               |                |              |                |                |
| <b>Conflict Type</b>        |              |               |                |                                  |               |                |              |                |                |
| 0=Minimal                   | ref.         |               |                |                                  |               |                | ref.         |                |                |
| 1=Moderate                  | -0.17        | (-0.45, 0.10) | 0.213          | -0.46                            | (-1.09, 0.18) | 0.156          | -0.73        | (-1.40, -0.06) | 0.034          |
| 2=Severe                    | 0.15         | (-0.33, 0.64) | 0.540          | 1.24                             | (0.03, 2.44)  | 0.044          | 1.33         | (0.13, 2.53)   | 0.031          |
| <b>Year</b>                 | 0.73         | (0.54, 0.92)  | <.0001         | 0.71                             | (0.42, 1.00)  | <.0001         | 0.70         | (0.40, 1.00)   | <.0001         |
| <b>Conflict Type 1*time</b> | --           |               |                | 0.28                             | (-0.14, 0.70) | 0.196          | 0.47         | (0.00, 0.94)   | 0.044          |

|                             |       |               |        |       |                |       |       |                |        |
|-----------------------------|-------|---------------|--------|-------|----------------|-------|-------|----------------|--------|
| <b>Conflict Type 2*time</b> | --    |               |        | -1.08 | (-1.95, -0.21) | 0.015 | -1.15 | (-2.03, -0.27) | 0.010  |
| % Women illiterate          | 1.72  | (1.14, 2.30)  | <.0001 |       |                |       | 1.39  | (0.79, 1.99)   | <.0001 |
| Contracting type            | -0.18 | (-0.77, 0.42) | 0.561  |       |                |       | -0.02 | (-0.63, 0.59)  | 0.944  |
| Rural population            | 0.95  | (0.59, 1.30)  | <.0001 |       |                |       | 0.76  | (0.38, 1.15)   | <.0001 |
| Rural population            | -0.19 | (-0.62, 0.23) | 0.370  |       |                |       | -0.19 | (-0.68, 0.30)  | 0.003  |

| Care-seeking for ARI        | Bivariate    |               |                | Main Effect model w/o covariates |                |                | Adjusted     |                |                |
|-----------------------------|--------------|---------------|----------------|----------------------------------|----------------|----------------|--------------|----------------|----------------|
|                             | <i>Coef.</i> | <i>95% CI</i> | <i>p-value</i> | <i>Coef.</i>                     | <i>95% CI</i>  | <i>p-value</i> | <i>Coef.</i> | <i>95% CI</i>  | <i>p-value</i> |
| <b>Conflict Type</b>        |              |               |                |                                  |                |                |              |                |                |
| 0=Minimal                   | ref.         |               |                |                                  |                |                | ref.         |                |                |
| 1=Moderate                  | -0.24        | (-0.57, 0.08) | 0.135          | -0.91                            | (-1.60, -0.21) | 0.011          | -0.88        | (-1.58, -0.17) | 0.015          |
| 2=Severe                    | 0.32         | (-0.20, 0.84) | 0.222          | 0.49                             | (-0.83, 1.80)  | 0.469          | 0.56         | (-0.75, 1.88)  | 0.401          |
| <b>Year</b>                 | 0.58         | (0.38, 0.78)  | <.0001         | 0.32                             | (0.07, 0.56)   | 0.013          | 0.38         | (0.11, 0.65)   | 0.006          |
| <b>Conflict Type 1*time</b> | --           |               |                | 0.65                             | (0.23, 1.07)   | 0.002          | 0.59         | (0.16, 1.02)   | 0.008          |
| <b>Conflict Type 2*time</b> | --           |               |                | -0.16                            | (-1.13, 0.80)  | 0.739          | -0.30        | (-1.29, 0.69)  | 0.555          |
| % Women illiterate          | 0.21         | (-0.18, 0.59) | 0.291          |                                  |                |                | 0.34         | (-0.11, 0.8)   | 0.137          |
| Contracting type            | 0.45         | (-0.04, 0.94) | 0.073          |                                  |                |                | 0.50         | (0.00, 1.00)   | 0.051          |
| Rural population            | -0.19        | (-0.62, 0.23) | 0.370          |                                  |                |                | -0.19        | (-0.68, 0.3)   | 0.003          |

| BCG                         | Bivariate    |               |                | Main Effect model w/o covariates |               |                | Adjusted     |               |                |
|-----------------------------|--------------|---------------|----------------|----------------------------------|---------------|----------------|--------------|---------------|----------------|
|                             | <i>Coef.</i> | <i>95% CI</i> | <i>p-value</i> | <i>Coef.</i>                     | <i>95% CI</i> | <i>p-value</i> | <i>Coef.</i> | <i>95% CI</i> | <i>p-value</i> |
| <b>Conflict Type</b>        |              |               |                |                                  |               |                |              |               |                |
| 0=Minimal                   | ref.         |               |                |                                  |               |                | ref.         |               |                |
| 1=Moderate                  | 0.42         | (0.17, 0.66)  | 0.001          | 0.65                             | (0.05, 1.24)  | 0.033          | 0.35         | (-0.31, 1.00) | 0.296          |
| 2=Severe                    | 0.12         | (-0.40, 0.63) | 0.652          | 1.36                             | (0.18, 2.55)  | 0.024          | 1.52         | (0.32, 2.73)  | 0.014          |
| <b>Year</b>                 | 1.03         | (0.84, 1.23)  | <.0001         | 1.15                             | (0.89, 1.41)  | <.0001         | 1.15         | (0.86, 1.44)  | <.0001         |
| <b>Conflict Type 1*time</b> | --           |               |                | -0.24                            | (-0.65, 0.18) | 0.263          | 0.05         | (-0.45, 0.55) | 0.851          |

|                             |       |                |        |       |                |       |       |                |        |
|-----------------------------|-------|----------------|--------|-------|----------------|-------|-------|----------------|--------|
| <b>Conflict Type 2*time</b> | --    |                |        | -1.24 | (-2.05, -0.43) | 0.003 | -1.33 | (-2.17, -0.49) | 0.002  |
| % Women illiterate          | 1.62  | (1.15, 2.08)   | <.0001 |       |                |       | 1.02  | (0.53, 1.51)   | <.0001 |
| Contracting type            | -0.45 | (-0.90, -0.01) | 0.047  |       |                |       | -0.41 | (-0.84, 0.01)  | 0.055  |
| Rural population            | 1.39  | (1.16, 1.62)   | <.0001 |       |                |       | 1.22  | (0.99, 1.45)   | <.0001 |

| DPT3/Penta                  | Bivariate |                |         | Main Effect model w/o covariates |                |         | Adjusted |                |         |
|-----------------------------|-----------|----------------|---------|----------------------------------|----------------|---------|----------|----------------|---------|
|                             | Coef.     | 95% CI         | p-value | Coef.                            | 95% CI         | p-value | Coef.    | 95% CI         | p-value |
| <b>Conflict Type</b>        |           |                |         |                                  |                |         |          |                |         |
| 0=Minimal                   | ref.      |                |         |                                  |                |         | ref.     |                |         |
| 1=Moderate                  | -0.32     | (-0.55, -0.08) | 0.008   | -0.57                            | (-1.16, 0.02)  | 0.060   | -0.25    | (-0.85, 0.35)  | 0.409   |
| 2=Severe                    | -0.32     | (-0.83, 0.20)  | 0.232   | 1.67                             | (0.44, 2.90)   | 0.008   | 1.66     | (0.33, 2.98)   | 0.014   |
| <b>Year</b>                 | 0.16      | (-0.04, 0.35)  | 0.108   | 0.23                             | (-0.06, 0.52)  | 0.116   | 0.41     | (0.09, 0.72)   | 0.013   |
| <b>Conflict Type 1*time</b> | --        |                |         | 0.24                             | (-0.18, 0.67)  | 0.256   | -0.07    | (-0.51, 0.38)  | 0.769   |
| <b>Conflict Type 2*time</b> | --        |                |         | -1.97                            | (-2.85, -1.10) | <.0001  | -2.11    | (-3.05, -1.17) | <.0001  |
| % Women illiterate          | -1.31     | (-1.74, -0.88) | <.0001  |                                  |                |         | -0.49    | (-0.98, -0.01) | 0.046   |
| Contracting type            | 0.80      | (0.22, 1.37)   | 0.007   |                                  |                |         | 0.54     | (-0.04, 1.12)  | 0.068   |
| Rural population            | -1.65     | (-1.92, -1.37) | <.0001  |                                  |                |         | -1.52    | (-1.81, -1.23) | 0.786   |

| ORT                         | Bivariate |                |         | Main Effect model w/o covariates |                |         | Adjusted |                |         |
|-----------------------------|-----------|----------------|---------|----------------------------------|----------------|---------|----------|----------------|---------|
|                             | Coef.     | 95% CI         | p-value | Coef.                            | 95% CI         | p-value | Coef.    | 95% CI         | p-value |
| <b>Conflict Type</b>        |           |                |         |                                  |                |         |          |                |         |
| 0=Minimal                   | ref.      |                |         |                                  |                |         | ref.     |                |         |
| 1=Moderate                  | 0.45      | (0.13, 0.78)   | 0.006   | 0.66                             | (-0.08, 1.41)  | 0.081   | 1.06     | (0.3, 1.82)    | 0.006   |
| 2=Severe                    | -1.61     | (-2.14, -1.08) | <.0001  | -4.47                            | (-5.63, -3.31) | <.0001  | -4.39    | (-5.48, -3.31) | <.0001  |
| <b>Year</b>                 | 1.00      | (0.75, 1.24)   | <.0001  | 0.86                             | (0.6, 1.12)    | <.0001  | 1.02     | (0.73, 1.31)   | <.0001  |
| <b>Conflict Type 1*time</b> | --        |                |         | -0.21                            | (-0.7, 0.28)   | 0.396   | -0.43    | (-0.97, 0.1)   | 0.111   |
| <b>Conflict Type 2*time</b> | --        |                |         | 2.81                             | (2.08, 3.53)   | <.0001  | 2.78     | (2.06, 3.5)    | <.0001  |
| % Women illiterate          | -0.96     | (-1.27, -0.64) | <.0001  |                                  |                |         | -0.46    | (-0.89, -0.02) | 0.039   |
| Contracting type            | 0.13      | (-0.29, 0.54)  | 0.550   |                                  |                |         | -0.28    | (-0.67, 0.11)  | 0.163   |
| Rural population            | -1.26     | (-1.6, -0.93)  | <.0001  |                                  |                |         | -1.30    | (-1.65, -0.94) | 0.454   |

| Contraceptive prevalence<br>(any method) | Bivariate |        |         | Main Effect model w/o covariates |        |         | Adjusted |        |         |
|------------------------------------------|-----------|--------|---------|----------------------------------|--------|---------|----------|--------|---------|
|                                          | Coef.     | 95% CI | p-value | Coef.                            | 95% CI | p-value | Coef.    | 95% CI | p-value |

|                             |       |                |        |       |                |        |       |                |        |
|-----------------------------|-------|----------------|--------|-------|----------------|--------|-------|----------------|--------|
| <b>Conflict Type</b>        |       |                |        |       |                |        |       |                |        |
| 0=Minimal                   | ref.  |                |        |       |                |        | ref.  |                |        |
| 1=Moderate                  | 0.49  | (0.35, 0.62)   | <.0001 | -1.63 | (-2.17, -1.09) | <.0001 | -1.52 | (-2.03, -1.01) | <.0001 |
| 2=Severe                    | 0.79  | (0.6, 0.99)    | <.0001 | -1.51 | (-2.34, -0.67) | <.0001 | -1.52 | (-2.35, -0.7)  | <.0001 |
| <b>Year</b>                 | 0.63  | (0.5, 0.76)    | <.0001 | 0.08  | (-0.1, 0.27)   | 0.380  | 0.17  | (0, 0.35)      | 0.050  |
| <b>Conflict Type 1*time</b> | --    |                |        | 1.14  | (0.83, 1.45)   | <.0001 | 1.03  | (0.73, 1.32)   | <.0001 |
| <b>Conflict Type 2*time</b> | --    |                |        | 1.21  | (0.73, 1.69)   | <.0001 | 1.22  | (0.74, 1.69)   | <.0001 |
| % Women illiterate          | -0.24 | (-0.44, -0.04) | 0.018  |       |                |        | 0.38  | (0.22, 0.53)   | <.0001 |
| Contracting type            | 0.04  | (-0.21, 0.3)   | 0.741  |       |                |        | -0.42 | (-0.7, -0.14)  | 0.003  |
| Rural population            | -1.08 | (-1.26, -0.91) | <.0001 |       |                |        | -1.16 | (-1.32, -1.01) | <.0001 |

| ANC                         | Bivariate |                |         | Main Effect model w/o covariates |                |         | Adjusted |                |         |
|-----------------------------|-----------|----------------|---------|----------------------------------|----------------|---------|----------|----------------|---------|
|                             | Coef.     | 95% CI         | p-value | Coef.                            | 95% CI         | p-value | Coef.    | 95% CI         | p-value |
| <b>Conflict Type</b>        |           |                |         |                                  |                |         |          |                |         |
| 0=Minimal                   | ref.      |                |         |                                  |                |         | ref.     |                |         |
| 1=Moderate                  | 0.60      | (0.42, 0.79)   | <.0001  | -1.10                            | (-1.74, -0.46) | 0.001   | -0.75    | (-1.33, -0.17) | 0.012   |
| 2=Severe                    | -0.06     | (-0.41, 0.28)  | 0.730   | -1.48                            | (-2.68, -0.28) | 0.016   | -1.70    | (-2.88, -0.51) | 0.005   |
| <b>Year</b>                 | 1.60      | (1.4, 1.81)    | <.0001  | 1.35                             | (1.09, 1.61)   | <.0001  | 1.69     | (1.45, 1.93)   | <.0001  |
| <b>Conflict Type 1*time</b> | --        |                |         | 0.71                             | (0.31, 1.1)    | <.0001  | 0.43     | (0.06, 0.8)    | 0.024   |
| <b>Conflict Type 2*time</b> | --        |                |         | 0.57                             | (-0.13, 1.28)  | 0.111   | 0.66     | (-0.05, 1.37)  | 0.070   |
| % Women illiterate          | -1.82     | (-2.02, -1.62) | <.0001  |                                  |                |         | -1.07    | (-1.28, -0.86) | <.0001  |
| Contracting type            | 0.19      | (-0.17, 0.54)  | 0.299   |                                  |                |         | -0.27    | (-0.56, 0.03)  | 0.081   |
| Rural population            | -1.89     | (-2.1, -1.67)  | <.0001  |                                  |                |         | -2.02    | (-2.27, -1.77) | 0.037   |

B, 2010-2018

| Skilled birth attendance | Bivariate |        |         | Main Effect model w/o covariates |        |         | Adjusted |        |         |
|--------------------------|-----------|--------|---------|----------------------------------|--------|---------|----------|--------|---------|
|                          | Coef.     | 95% CI | p-value | Coef.                            | 95% CI | p-value | Coef.    | 95% CI | p-value |
| <b>Conflict Type</b>     |           |        |         |                                  |        |         |          |        |         |
| 0=Minimal                | ref.      |        |         |                                  |        |         | ref.     |        |         |

|                             |       |                |        |       |                |        |       |                |        |
|-----------------------------|-------|----------------|--------|-------|----------------|--------|-------|----------------|--------|
| 1=Moderate                  | 0.41  | (0.12, 0.69)   | 0.005  | 1.15  | (0.52, 1.79)   | <.0001 | 0.79  | (0.18, 1.39)   | 0.011  |
| 2=Severe                    | -0.36 | (-0.89, 0.16)  | 0.173  | -0.41 | (-1.55, 0.73)  | 0.479  | -0.49 | (-1.65, 0.67)  | 0.410  |
| <b>Year</b>                 | 0.83  | (0.64, 1.02)   | <.0001 | 1.33  | (1.06, 1.61)   | <.0001 | 1.13  | (0.88, 1.39)   | <.0001 |
| <b>Conflict Type 1*time</b> | --    |                |        | -0.75 | (-1.15, -0.35) | <.0001 | -0.53 | (-0.89, -0.16) | 0.005  |
| <b>Conflict Type 2*time</b> | --    |                |        | 0.09  | (-0.63, 0.64)  | 0.980  | 0.10  | (-0.55, 0.75)  | 0.764  |
| % Women illiterate          | -1.65 | (-1.90, -1.40) | <.0001 |       |                |        | -1.17 | (-1.52, -0.92) | <.0001 |
| Contracting type            | -0.25 | (-0.63, -0.13) | 0.198  |       |                |        | -0.55 | (-0.95, -0.16) | 0.006  |
| Rural population            | -1.89 | (-2.17, -1.62) | <.0001 |       |                |        | -1.66 | (-1.95, -1.38) | <.0001 |

| Measles vaccination         | Bivariate    |                |                | Main Effect model w/o covariates |               |                | Adjusted     |                |                |
|-----------------------------|--------------|----------------|----------------|----------------------------------|---------------|----------------|--------------|----------------|----------------|
|                             | <i>Coef.</i> | <i>95% CI</i>  | <i>p-value</i> | <i>Coef.</i>                     | <i>95% CI</i> | <i>p-value</i> | <i>Coef.</i> | <i>95% CI</i>  | <i>p-value</i> |
| <b>Conflict Type</b>        |              |                |                |                                  |               |                |              |                |                |
| 0=Minimal                   | ref.         |                |                |                                  |               |                | ref.         |                |                |
| 1=Moderate                  | 0.08         | (-0.14, 0.30)  | 0.471          | 0.50                             | (-0.22, 1.22) | 0.176          | 0.32         | (-0.42, 1.06)  | 0.393          |
| 2=Severe                    | -0.24        | (-0.58, 0.11)  | 0.183          | -1.22                            | (-2.73, 0.29) | 0.115          | -1.24        | (-2.78, 0.30)  | 0.113          |
| <b>Year</b>                 | 1.20         | (0.99, 1.40)   | <.0001         | 1.49                             | (1.16, 1.83)  | <.0001         | 1.39         | (1.05, 1.73)   | 0.186          |
| <b>Conflict Type 1*time</b> |              |                |                | -0.40                            | (-0.85, 0.04) | 0.076          | -0.30        | (-0.74, 0.14)  | 0.440          |
| <b>Conflict Type 2*time</b> |              |                |                | 0.29                             | (-0.54, 1.12) | 0.494          | 0.33         | (-0.51, 1.17)  | <.0001         |
| % Women illiterate          | -0.96        | (-1.18, -0.73) | <.0001         |                                  |               |                | -0.68        | (-0.91, -0.45) | 0.889          |
| Contracting type            | 0.01         | (-0.40, 0.41)  | 0.971          |                                  |               |                | -0.03        | (-0.46, 0.40)  | <.0001         |
| Rural population            | 1.12         | (-0.96, -0.46) | <.0001         |                                  |               |                | -0.53        | (-0.77, -0.29) | 0.076          |

| Care-seeking for ARI | Bivariate    |               |                | Main Effect model w/o covariates |               |                | Adjusted     |               |                |
|----------------------|--------------|---------------|----------------|----------------------------------|---------------|----------------|--------------|---------------|----------------|
|                      | <i>Coef.</i> | <i>95% CI</i> | <i>p-value</i> | <i>Coef.</i>                     | <i>95% CI</i> | <i>p-value</i> | <i>Coef.</i> | <i>95% CI</i> | <i>p-value</i> |
| <b>Conflict Type</b> |              |               |                |                                  |               |                |              |               |                |
| 0=Minimal            | ref.         |               |                |                                  |               |                | ref.         |               |                |
| 1=Moderate           | 0.44         | (0.21, 0.66)  | <.0001         | 0.48                             | (-0.21, 1.17) | 0.175          | 0.49         | (-0.22, 1.19) | 0.177          |

|                             |       |                |       |       |               |       |       |               |       |
|-----------------------------|-------|----------------|-------|-------|---------------|-------|-------|---------------|-------|
| 2=Severe                    | 0.43  | (-0.05, 0.92)  | 0.081 | 0.06  | (-1.67, 1.78) | 0.949 | 0.07  | (-1.69, 1.82) | 0.940 |
| <b>Year</b>                 | 0.40  | (0.14, 0.67)   | 0.003 | 0.38  | (0.06, 0.71)  | 0.020 | 0.32  | (-0.01, 0.64) | 0.054 |
| <b>Conflict Type 1*time</b> |       |                |       | -0.08 | (-0.57, 0.41) | 0.752 | -0.03 | (-0.51, 0.45) | 0.908 |
| <b>Conflict Type 2*time</b> |       |                |       | 0.11  | (-0.90, 1.11) | 0.842 | 0.12  | (-0.88, 1.12) | 0.810 |
| % Women illiterate          | -0.38 | (-0.73, -0.03) | 0.031 |       |               |       | -0.32 | (-0.65, 0.01) | 0.057 |
| Contracting type            | -0.01 | (-0.29, 0.26)  | 0.927 |       |               |       | -0.37 | (-0.65, 0.01) | 0.017 |
| Rural population            | -0.13 | (-0.49, 0.23)  | 0.469 |       |               |       | 0.07  | (-0.27, 0.41) | 0.696 |

| BCG                         | Bivariate |                |         | Main Effect model w/o covariates |                |         | Adjusted |                |         |
|-----------------------------|-----------|----------------|---------|----------------------------------|----------------|---------|----------|----------------|---------|
|                             | Coef.     | 95% CI         | p-value | Coef.                            | 95% CI         | p-value | Coef.    | 95% CI         | p-value |
| <b>Conflict Type</b>        |           |                |         |                                  |                |         |          |                |         |
| 0=Minimal                   | ref.      |                |         |                                  |                |         | ref.     |                |         |
| 1=Moderate                  | -0.39     | (-0.61, -0.16) | 0.001   | 1.59                             | (0.82, 2.36)   | <.0001  | 1.39     | (0.63, 2.16)   | <.0001  |
| 2=Severe                    | -0.37     | (-0.74, -0.01) | 0.043   | -1.15                            | (-2.55, 0.25)  | 0.106   | -1.20    | (-2.63, 0.23)  | 0.099   |
| <b>Year</b>                 | 0.64      | (0.43, 0.85)   | <.0001  | 1.69                             | (1.30, 2.08)   | <.0001  | 1.54     | (1.15, 1.93)   | <.0001  |
| <b>Conflict Type 1*time</b> |           |                |         | -1.42                            | (-1.91, -0.92) | <.0001  | -1.30    | (-1.79, -0.81) | <.0001  |
| <b>Conflict Type 2*time</b> |           |                |         | 0.03                             | (0.78, 0.84)   | 0.939   | 0.06     | (-0.75, 0.88)  | 0.879   |
| % Women illiterate          | -1.15     | (-1.42, -0.88) | <.0001  |                                  |                |         | -0.84    | (-1.11, -0.57) | <.0001  |
| Contracting type            | -0.31     | (-0.74, 0.13)  | 0.168   |                                  |                |         | 0.10     | (-0.34, 0.55)  | 0.643   |
| Rural population            | -0.71     | (-0.98, -0.43) | <.0001  |                                  |                |         | -0.52    | (-0.80, -0.24) | <.0001  |

| DPT3/Penta           | Bivariate |                |         | Main Effect model w/o covariates |               |         | Adjusted |                |         |
|----------------------|-----------|----------------|---------|----------------------------------|---------------|---------|----------|----------------|---------|
|                      | Coef.     | 95% CI         | p-value | Coef.                            | 95% CI        | p-value | Coef.    | 95% CI         | p-value |
| <b>Conflict Type</b> |           |                |         |                                  |               |         |          |                |         |
| 0=Minimal            | ref.      |                |         |                                  |               |         | ref.     |                |         |
| 1=Moderate           | -0.42     | (-0.64, -0.20) | <.0001  | 0.94                             | (0.18, 1.70)  | 0.016   | 0.68     | (-0.08, 1.44)  | 0.078   |
| 2=Severe             | -0.13     | (-0.51, 0.25)  | 0.510   | -3.82                            | (-5.4, -2.23) | <.0001  | -3.85    | (-5.41, -2.30) | <.0001  |
| <b>Year</b>          | 1.15      | (0.93, 1.37)   | <.0001  | 1.85                             | (1.50, 2.21)  | <.0001  | 1.71     | (1.35, 2.07)   | <.0001  |

|                             |       |                |        |       |               |        |       |                |        |
|-----------------------------|-------|----------------|--------|-------|---------------|--------|-------|----------------|--------|
| <b>Conflict Type 1*time</b> |       |                |        | -1.02 | (-1.47, 0.56) | <.0001 | -0.88 | (-1.33, -0.43) | <.0001 |
| <b>Conflict Type 2*time</b> |       |                |        | 1.54  | (0.69, 2.39)  | <.0001 | 1.56  | (0.71, 2.41)   | <.0001 |
| % Women illiterate          | -1.18 | (-1.40, -0.96) | <.0001 |       |               |        | -0.90 | (-1.13, -0.67) | <.0001 |
| Contracting type            | -0.16 | (-0.53, 0.21)  | 0.404  |       |               |        | 0.24  | (-0.09, 0.56)  | 0.151  |
| Rural population            | -0.60 | (-0.83, -0.36) | <.0001 |       |               |        | -0.40 | (-0.64, -0.15) | 0.002  |

| ORT                         | Bivariate    |                |                | Main Effect model w/o covariates |                |                | Adjusted     |                |                |
|-----------------------------|--------------|----------------|----------------|----------------------------------|----------------|----------------|--------------|----------------|----------------|
|                             | <i>Coef.</i> | <i>95% CI</i>  | <i>p-value</i> | <i>Coef.</i>                     | <i>95% CI</i>  | <i>p-value</i> | <i>Coef.</i> | <i>95% CI</i>  | <i>p-value</i> |
| <b>Conflict Type</b>        |              |                |                |                                  |                |                |              |                |                |
| 0=Minimal                   | ref.         |                |                |                                  |                |                | ref.         |                |                |
| 1=Moderate                  | 0.17         | (-0.07, 0.40)  | 0.161          | 0.16                             | (-0.63, 0.94)  | 0.695          | 0.23         | (-0.55, 1.02)  | 0.556          |
| 2=Severe                    | 0.13         | (-0.21, 0.47)  | 0.448          | 2.09                             | (0.95, 3.24)   | <.0001         | 2.09         | (0.93, 3.25)   | <.0001         |
| <b>Year</b>                 | -0.53        | (-0.76, -0.29) | <.0001         | -0.56                            | (-0.85, -0.27) | <.0001         | -0.49        | (-0.78, -0.20) | 0.001          |
| <b>Conflict Type 1*time</b> |              |                |                | 0.08                             | (-0.37, 0.53)  | 0.718          | 0.03         | (-0.41, 0.48)  | 0.887          |
| <b>Conflict Type 2*time</b> |              |                |                | -0.95                            | (-1.60, -0.29) | 0.005          | -0.97        | (-1.63, -0.31) | 0.004          |
| % Women illiterate          | 0.40         | (0.16, 0.65)   | 0.001          |                                  |                |                | 0.19         | (-0.06, 0.44)  | 0.143          |
| Contracting type            | 0.36         | (0.02, 0.71)   | 0.039          |                                  |                |                | 0.29         | (-0.09, 0.66)  | 0.131          |
| Rural population            | 0.33         | (0.11, 0.54)   | 0.004          |                                  |                |                | 0.28         | (0.07, 0.50)   | 0.009          |

| Contraceptive Prevalence (any method) | Bivariate    |               |                | Main Effect model w/o covariates |                |                | Adjusted     |                |                |
|---------------------------------------|--------------|---------------|----------------|----------------------------------|----------------|----------------|--------------|----------------|----------------|
|                                       | <i>Coef.</i> | <i>95% CI</i> | <i>p-value</i> | <i>Coef.</i>                     | <i>95% CI</i>  | <i>p-value</i> | <i>Coef.</i> | <i>95% CI</i>  | <i>p-value</i> |
| <b>Conflict Type</b>                  |              |               |                |                                  |                |                |              |                |                |
| 0=Minimal                             | ref.         |               |                |                                  |                |                | ref.         |                |                |
| 1=Moderate                            | 0.64         | (0.46, 0.82)  | <.0001         | 1.47                             | (1.05, 1.89)   | <.0001         | 1.52         | (1.09, 1.95)   | <.0001         |
| 2=Severe                              | 0.92         | (0.66, 1.18)  | <.0001         | 1.47                             | (0.86, 2.07)   | <.0001         | 1.42         | (0.82, 2.02)   | <.0001         |
| <b>Year</b>                           | 0.69         | (0.54, 0.84)  | <.0001         | 1.14                             | (0.92, 1.37)   | <.0001         | 1.13         | (0.91, 1.34)   | <.0001         |
| <b>Conflict Type 1*time</b>           |              |               |                | -0.83                            | (-1.11, -0.54) | <.0001         | -0.85        | (-1.14, -0.57) | <.0001         |
| <b>Conflict Type 2*time</b>           |              |               |                | -0.55                            | (-0.95, -0.14) | 0.008          | -0.50        | (-0.92, -0.08) | 0.020          |



|                    |       |                |        |  |  |  |       |                |        |
|--------------------|-------|----------------|--------|--|--|--|-------|----------------|--------|
| % Women illiterate | 0.37  | (0.24, 0.50)   | <.0001 |  |  |  | 0.68  | (0.57, 0.80)   | <.0001 |
| Contracting type   | -0.04 | (-0.33, 0.24)  | 0.759  |  |  |  | -0.69 | (-1.03, -0.36) | <.0001 |
| Rural population   | -0.68 | (-0.84, -0.53) | <.0001 |  |  |  | -0.83 | (-0.99, -0.67) | <.0001 |

| ANC                         | Bivariate |                |         | Main Effect model w/o covariates |                |         | Adjusted |                |         |
|-----------------------------|-----------|----------------|---------|----------------------------------|----------------|---------|----------|----------------|---------|
|                             | Coef.     | 95% CI         | p-value | Coef.                            | 95% CI         | p-value | Coef.    | 95% CI         | p-value |
| <b>Conflict Type</b>        |           |                |         |                                  |                |         |          |                |         |
| 0=Minimal                   | ref.      |                |         |                                  |                |         | ref.     |                |         |
| 1=Moderate                  | 0.30      | (0.04, 0.57)   | 0.025   | 1.09                             | (0.53, 1.65)   | <.0001  | 0.86     | (0.30, 1.42)   | 0.003   |
| 2=Severe                    | -0.34     | (-0.74, 0.05)  | 0.089   | -0.31                            | (-1.18, 0.55)  | 0.478   | -0.25    | (-1.17, 0.66)  | 0.587   |
| <b>Year</b>                 | -0.63     | (-0.78, -0.47) | <.0001  | -0.12                            | (-0.33, 0.08)  | 0.227   | -0.47    | (-0.71, -0.23) | <.0001  |
| <b>Conflict Type 1*time</b> |           |                |         | -0.77                            | (-1.08, -0.46) | <.0001  | -0.63    | (-0.97, -0.30) | <.0001  |
| <b>Conflict Type 2*time</b> |           |                |         | -0.02                            | (-0.50, 0.45)  | 0.921   | -0.01    | (-0.59, 0.57)  | 0.972   |
| % Women illiterate          | -1.56     | (-1.81, -1.32) | <.0001  |                                  |                |         | -1.18    | (-1.44, -0.92) | <.0001  |
| Contracting type            | -0.49     | (-0.82, -0.16) | 0.004   |                                  |                |         | -0.72    | (-1.09, -0.35) | <.0001  |
| Rural population            | -1.50     | (-1.75, -1.25) | <.0001  |                                  |                |         | -1.28    | (-1.53, -1.03) | <.0001  |

**eTable 7. RMNCH Interventions Coverage by Conflict Status**

**A, 2003-2010**

| Indicator                          | Survey          | N      | Minimal Conflict | N     | Moderate Conflict | N     | Severe Conflict | Minimal vs. Moderate p-value | Minimal vs. Severe p-value |
|------------------------------------|-----------------|--------|------------------|-------|-------------------|-------|-----------------|------------------------------|----------------------------|
| Contraceptives (Any method)        | Mean % 2003     | 12,048 | 5.2              | 5,654 | 20.3              | 3,260 | 6.6             | <.0001                       | 0.013                      |
|                                    | Mean % 2010     | 10,042 | 12.7             | 5,801 | 22.8              | 2,231 | 25.1            | <.0001                       | <.0001                     |
|                                    | Mean difference |        | 7.5              |       | 2.5               |       | 18.5            | <.0001                       | <.0001                     |
| Contraceptives (Any modern method) | Mean % 2003     | 12,033 | 4.4              | 5,647 | 16.2              | 3,255 | 6.3             | <.0001                       | 0.001                      |
|                                    | Mean % 2010     | 10,042 | 11.8             | 5,801 | 20.1              | 2,231 | 24.6            | <.0001                       | <.0001                     |
|                                    | Mean difference |        | 7.4              |       | 3.8               |       | 18.3            | <.0001                       | <.0001                     |
| ANC by skilled provider            | Mean % 2003     | 6,295  | 8.7              | 2,890 | 31.8              | 1,702 | 10.5            | <.0001                       | 0.330                      |
|                                    | Mean % 2010     | 2,714  | 45.7             | 1,808 | 56.3              | 352   | 36.8            | 0.007                        | 0.068                      |
|                                    | Mean difference |        | 37.0             |       | 24.5              |       | 26.3            | <.0001                       | 0.031                      |
| Facility deliveries                | Mean % 2003     | 6,370  | 5.4              | 2,919 | 28.3              | 1,719 | 7.7             | <.0001                       | 0.011                      |
|                                    | Mean % 2010     | 2,786  | 27.3             | 1,820 | 45.3              | 356   | 15.3            | <.0001                       | 0.013                      |
|                                    | Mean difference |        | 21.9             |       | 17.0              |       | 7.6             | <.0001                       | 0.001                      |
| SBA                                | Mean % 2003     | 6,380  | 7.4              | 2,915 | 29.5              | 1,720 | 8.3             | <.0001                       | 0.384                      |
|                                    | Mean % 2010     | 2,786  | 33.4             | 1,820 | 49.9              | 356   | 23.3            | <.0001                       | 0.037                      |
|                                    | Mean difference |        | 26.1             |       | 20.3              |       | 15.0            | <.0001                       | 0.021                      |
| BCG                                | Mean % 2003     | 2,505  | 41.6             | 1,283 | 19.2              | 857   | 49.3            | <.0001                       | 0.010                      |
|                                    | Mean % 2010     | 1,429  | 60.9             | 816   | 71.8              | 247   | 34.8            | 0.026                        | <.0001                     |
|                                    | Mean difference |        | 19.3             |       | 52.5              |       | -14.6           | <.0001                       | <.0001                     |
| DPT3/Penta                         | Mean % 2003     | 2,504  | 23.3             | 1,283 | 45.5              | 857   | 11.7            | <.0001                       | <.0001                     |
|                                    | Mean % 2010     | 1,400  | 31.8             | 793   | 37.8              | 240   | 7.0             | 0.168                        | <.0001                     |
|                                    | Mean difference |        | 8.4              |       | -7.7              |       | -4.7            | 0.001                        | 0.007                      |
| Measles                            | Mean % 2003     | 2,516  | 27.7             | 1,285 | 17.2              | 851   | 28.6            | 0.001                        | 0.733                      |
|                                    | Mean % 2010     | 1,413  | 39.9             | 817   | 47.7              | 244   | 20.4            | 0.076                        | 0.003                      |
|                                    | Mean difference |        | 12.2             |       | 30.5              |       | -8.2            | <.0001                       | 0.006                      |
| Care seeking for ARI               | Mean % 2003     | 3,110  | 45.0             | 1,121 | 54.4              | 487   | 36.2            | 0.004                        | 0.025                      |
|                                    | Mean % 2010     | 1,696  | 57.0             | 1,041 | 65.7              | 212   | 61.8            | 0.020                        | 0.546                      |
|                                    | Mean difference |        | 12.0             |       | 11.3              |       | 25.7            | 0.967                        | 0.126                      |
| ORT                                | Mean % 2003     | 4,800  | 25.9             | 2,071 | 41.6              | 865   | 17.2            | <.0001                       | 0.007                      |
|                                    | Mean % 2010     | 2,059  | 46.3             | 1,044 | 58.6              | 337   | 74.0            | 0.034                        | <.0001                     |

|  |                 |  |      |  |      |  |      |  |       |  |        |
|--|-----------------|--|------|--|------|--|------|--|-------|--|--------|
|  | Mean difference |  | 20.4 |  | 17.0 |  | 56.8 |  | 0.400 |  | <.0001 |
|--|-----------------|--|------|--|------|--|------|--|-------|--|--------|

## B, 2010-2018

| Indicator                           | Survey          | N     | Minimal Conflict | N     | Moderate Conflict | N      | Severe Conflict | Minimal vs. Moderate p-value | Minimal vs. Severe p-value |
|-------------------------------------|-----------------|-------|------------------|-------|-------------------|--------|-----------------|------------------------------|----------------------------|
| Contraceptives (Any method)         | Mean % 2010     | 4,426 | 14.1             | 7,329 | 16.4              | 6,319  | 20.7            | 0.099                        | <.0001                     |
|                                     | Mean % 2018     | 2,222 | 27.8             | 4,994 | 23.7              | 6,920  | 32.3            | 0.049                        | 0.053                      |
|                                     | Mean difference |       | 13.7             |       | 7.3               |        | 11.6            | 0.011                        | 0.075                      |
| Contraceptives (Any modern method)- | Mean % 2010     | 4,426 | 12.7             | 7,329 | 14.4              | 6,319  | 19.8            | 0.212                        | <.0001                     |
|                                     | Mean % 2018     | 2,222 | 25.8             | 4,994 | 19.0              | 6,920  | 28.5            | <.0001                       | 0.208                      |
|                                     | Mean difference |       | 13.0             |       | 4.5               |        | 8.7             | 0.001                        | 0.007                      |
| ANC by skilled provider             | Mean % 2010     | 1,223 | 50.2             | 1,954 | 49.9              | 1,697  | 46.7            | 0.933                        | 0.350                      |
|                                     | Mean % 2018     | 3,099 | 42.1             | 7,440 | 34.2              | 10,367 | 32.6            | <.0001                       | <.0001                     |
|                                     | Mean difference |       | 8.1              |       | 15.7              |        | 14.0            | 0.081                        | 0.145                      |
| Facility deliveries                 | Mean % 2010     | 1,228 | 32.3             | 1,974 | 37.6              | 1,760  | 27.3            | 0.195                        | 0.195                      |
|                                     | Mean % 2018     | 1,402 | 62.9             | 3,395 | 46.7              | 4,529  | 59.4            | 0.005                        | 0.008                      |
|                                     | Mean difference |       | 30.7             |       | 9.0               |        | 32.1            | <.0001                       | 0.718                      |
| SBA                                 | Mean % 2010     | 1,228 | 36.1             | 1,974 | 44.7              | 1,760  | 32.6            | 0.042                        | 0.395                      |
|                                     | Mean % 2018     | 1,404 | 64.1             | 3,399 | 52.9              | 4,534  | 60.7            | 0.017                        | 0.019                      |
|                                     | Mean difference |       | 27.9             |       | 8.2               |        | 28.1            | 0.001                        | 0.947                      |
| BCG                                 | Mean % 2010     | 1,429 | 60.9             | 816   | 71.8              | 247    | 34.8            | 0.026                        | <.0001                     |
|                                     | Mean % 2018     | 1,276 | 91.6             | 3,182 | 76.8              | 4,480  | 73.0            | <.0001                       | <.0001                     |
|                                     | Mean difference |       | 30.7             |       | 5.1               |        | 38.2            | <.0001                       | 0.340                      |
| DPT3/Penta                          | Mean % 2010     | 1,400 | 31.8             | 793   | 37.8              | 240    | 7.0             | 0.168                        | <.0001                     |
|                                     | Mean % 2018     | 1,276 | 75.4             | 3,182 | 60.0              | 4,480  | 56.4            | <.0001                       | <.0001                     |
|                                     | Mean difference |       | 43.6             |       | 22.2              |        | 49.4            | <.0001                       | 0.013                      |
| Measles                             | Mean % 2010     | 1,413 | 39.9             | 817   | 47.7              | 244    | 20.4            | 0.076                        | 0.003                      |
|                                     | Mean % 2018     | 1,315 | 74.6             | 4,419 | 64.4              | 5,332  | 70.9            | 0.009                        | 0.315                      |
|                                     | Mean difference |       | 34.8             |       | 16.8              |        | 50.5            | 0.003                        | 0.039                      |
| Care seeking for ARI                | Mean % 2010     | 1,696 | 57.0             | 1,041 | 65.7              | 212    | 61.8            | 0.020                        | 0.546                      |
|                                     | Mean % 2018     | 568   | 60.2             | 623   | 65.2              | 878    | 72.5            | 0.336                        | 0.018                      |
|                                     | Mean difference |       | 3.3              |       | 0.4               |        | 10.6            | 0.111                        | 0.001                      |
| ORT                                 | Mean % 2010     | 2,059 | 46.3             | 1,044 | 58.6              | 337    | 74.0            | 0.034                        | <.0001                     |

| Indicator | Survey          | N   | Minimal Conflict | N     | Moderate Conflict | N     | Severe Conflict | Minimal vs. Moderate p-value | Minimal vs. Severe p-value |
|-----------|-----------------|-----|------------------|-------|-------------------|-------|-----------------|------------------------------|----------------------------|
|           | Mean % 2018     | 730 | 36.4             | 1,570 | 37.7              | 1,873 | 41.7            | 0.743                        | 0.157                      |
|           | Mean difference |     | 9.9              |       | 20.9              |       | 32.3            | 0.578                        | 0.410                      |

**eTable 8. Adjusted Percentage Point Change in Key RMNCH Interventions by Conflict Status During 2003-2018 and 2010-2018\***

|                      | Minimal     |             |                |             |            |                 | Moderate    |             |                |             |            |                | Severe      |             |                |             |            |                 | 2003-2018                    |                            | 2010-2018                    |                            |
|----------------------|-------------|-------------|----------------|-------------|------------|-----------------|-------------|-------------|----------------|-------------|------------|----------------|-------------|-------------|----------------|-------------|------------|-----------------|------------------------------|----------------------------|------------------------------|----------------------------|
|                      | MICS 2003 % | MICS 2010 % | 2003-2010 AAPC | MICS 2010 % | AHS 2018 % | 2010-2018 AAPC† | MICS 2003 % | MICS 2010 % | 2003-2010 AAPC | MICS 2010 % | AHS 2018 % | 2010-2018 AAPC | MICS 2003 % | MICS 2010 % | 2003-2010 AAPC | MICS 2010 % | AHS 2018 % | 2010-2018 AAPC‡ | Minimal vs. Moderate p-value | Minimal vs. Severe p-value | Minimal vs. Moderate p-value | Minimal vs. Severe p-value |
| Contraceptive Use    | 11.0        | 12.8        | 0.2            | 11.9        | 23.9       | 1.3             | 7.1         | 19.7        | 1.6            | 20.7        | 25.3       | 0.5            | 8.4         | 26.1        | 2.2            | 25.0        | 38.0       | 1.4             | .001                         | <.001                      | <.001                        | .02                        |
| ANC                  | 18.0        | 46.8        | 3.6            | 46.5        | 36.4       | -1.1            | 14.5        | 49.3        | 4.4            | 51.6        | 28.5       | -2.6           | 8.5         | 38.9        | 3.8            | 40.8        | 31.0       | -1.1            | .021                         | .07                        | <.001                        | .97                        |
| SBA                  | 16.1        | 35.9        | 2.5            | 36.1        | 60.4       | 2.7             | 12.5        | 39.3        | 3.3            | 41.4        | 54.6       | 1.5            | 8.3         | 27.4        | 2.4            | 29.0        | 54.1       | 2.8             | .002                         | .29                        | .005                         | .76                        |
| BCG                  | 33.9        | 60.0        | 3.3            | 65.7        | 89.2       | 2.6             | 42.7        | 69.2        | 3.3            | 66.7        | 71.7       | 0.6            | 38.3        | 34.1        | -0.5           | 38.0        | 74.2       | 4.0             | .85                          | .002                       | <.001                        | .88                        |
| DPT3/Penta           | 29.4        | 37.5        | 1.0            | 37.7        | 76.0       | 4.3             | 23.9        | 29.8        | 0.7            | 33.5        | 52.8       | 2.1            | 21.8        | 5.4         | -2.0           | 6.2         | 60.8       | 6.1             | .77                          | <.0001                     | <.001                        | <.0001                     |
| Measles              | 25.5        | 40.3        | 1.9            | 43.0        | 74.4       | 3.5             | 21.1        | 45.5        | 3.1            | 43.6        | 69.1       | 2.8            | 28.9        | 20.7        | -1.0           | 23.8        | 62.2       | 4.3             | .04                          | .01                        | .44                          | <.001                      |
| ORT                  | 27.2        | 49.3        | 2.8            | 47.5        | 35.7       | -1.3            | 40.3        | 53.9        | 1.7            | 54.1        | 42.8       | -1.3           | 7.5         | 74.9        | 8.4            | 73.4        | 39.3       | -3.8            | .11                          | <.001                      | .89                          | .004                       |
| Care seeking for ARI | 47.5        | 56.8        | 1.2            | 54.4        | 62.2       | 0.9             | 40.5        | 64.0        | 2.9            | 65.3        | 71.6       | 0.7            | 54.1        | 56.1        | 0.3            | 59.1        | 69.2       | 1.1             | .008                         | .56                        | .91                          | .81                        |

Abbreviations: AAPC: Average Annual % Point Change, AHS: Afghanistan Health Survey, ANC: Antenatal care, ARI: Acute respiratory infection, BCG: bacille Calmette-Guerin vaccine, DPT3: diphtheria, pertussis and tetanus (3 doses), MICS: Multiple Indicator Cluster Survey, ORT: Oral rehydration therapy, RMNCH: Reproductive, maternal, newborn and child health, SBA: Skilled birth attendant

\*Models adjusted for the main effects of conflict and time, and covariates including maternal illiteracy, contracting type, and rural residence; complete results in the appendix.

† (% in 2010 – % in 2003) / 8 years.

‡ (% in 2018 – % in 2010) / 9 years.

**eTable 9. Health Systems Composite Indicators by Conflict Status**

**A, 2004-2010**

| Indicator                             | Survey               | N  | Minimal Conflict Group | N | Moderate Conflict Group | N | Severe Conflict Group | Minimal vs. Moderate p-value | Minimal vs. Severe p-value |
|---------------------------------------|----------------------|----|------------------------|---|-------------------------|---|-----------------------|------------------------------|----------------------------|
| Domain A Client and Community         | Mean % 2004          | 21 | 60.71(18.01)           | 8 | 65.98(6.86)             | 5 | 64.68(11.07)          | 0.690                        | 0.862                      |
|                                       | Mean % 2010          | 21 | 79.37(7.22)            | 8 | 79.48(6.59)             | 5 | 67.54(14.38)          | 0.999                        | 0.021                      |
|                                       | Mean difference (SD) |    | 18.66(15.36)           |   | 13.5(10.66)             |   | 2.86(8.34)            | 0.693                        | 0.067                      |
| Domain B Human Resources              | Mean % 2004          | 20 | 51.17(7.35)            | 8 | 52.86(8.3)              | 5 | 56.12(6.81)           | 0.853                        | 0.397                      |
|                                       | Mean % 2010          | 20 | 68.77(8.57)            | 8 | 73.73(7.08)             | 5 | 63.64(16.54)          | 0.354                        | 0.698                      |
|                                       | Mean difference (SD) |    | 17.6(9.99)             |   | 20.86(11.46)            |   | 7.52(15.29)           | 0.766                        | 0.186                      |
| Domain C Physical Capacity            | Mean % 2004          | 20 | 46.99(7.87)            | 8 | 48.1(6.28)              | 5 | 54.82(11.94)          | 0.944                        | 0.154                      |
|                                       | Mean % 2010          | 20 | 75.57(8.46)            | 8 | 74.18(4.98)             | 5 | 67.76(7.98)           | 0.902                        | 0.123                      |
|                                       | Mean difference (SD) |    | 29.33(9.89)            |   | 26.08(8.67)             |   | 12.94(6.18)           | 0.678                        | 0.003                      |
| Domain D Quality of Service Provision | Mean % 2004          | 20 | 48.6(8.24)             | 8 | 38.76(8.4)              | 5 | 43.56(15.4)           | 0.050                        | 0.549                      |
|                                       | Mean % 2010          | 20 | 48.92(10.90)           | 8 | 49.69(8.84)             | 5 | 38(12.9)              | 0.966                        | 0.136                      |
|                                       | Mean difference (SD) |    | 0.32(13.41)            |   | 10.93(7.17)             |   | -5.56(12.15)          | 0.107                        | 0.598                      |
| Domain E Management Systems           | Mean % 2004          | 20 | 64.97(13.1)            | 8 | 70.56(13.47)            | 5 | 49.6(29.21)           | 0.692                        | 0.160                      |
|                                       | Mean % 2010          | 20 | 78.98(12.97)           | 8 | 79.1(12.93)             | 5 | 65.16(22.71)          | 0.999                        | 0.154                      |
|                                       | Mean difference (SD) |    | 14.86(20.11)           |   | 8.54(24.19)             |   | 15.56(17.19)          | 0.749                        | 0.998                      |
| Domain F Overall Mission              | Mean % 2004          | 20 | 50.48(1.81)            | 8 | 49.63(2.15)             | 5 | 49.98(0.39)           | 0.494                        | 0.842                      |
|                                       | Mean % 2010          | 20 | 50.31(2.68)            | 8 | 50.69(3.52)             | 5 | 50.58(2.49)           | 0.948                        | 0.981                      |
|                                       | Mean difference (SD) |    | -0.18(3.78)            |   | 1.06(3.69)              |   | 0.6(2.75)             | 0.698                        | 0.905                      |
| Overall Means (Provincial)            | Mean % 2004          | 20 | 52.15(4.19)            | 8 | 51.38(3.42)             | 5 | 53.62(8.65)           | 0.925                        | 0.819                      |
|                                       | Mean % 2010          | 20 | 66.41(6.50)            | 8 | 67.89(4.15)             | 5 | 58.88(10.05)          | 0.856                        | 0.074                      |

|  |                      |  |            |  |             |  |            |       |       |
|--|----------------------|--|------------|--|-------------|--|------------|-------|-------|
|  | Mean difference (SD) |  | 14.9(6.54) |  | 16.51(6.29) |  | 5.26(4.57) | 0.812 | 0.012 |
|--|----------------------|--|------------|--|-------------|--|------------|-------|-------|

**B, 2011-2016**

| Indicator                             | Survey               | N | Minimal Conflict Group | N  | Moderate Conflict Group | N  | Severe Conflict Group | Minimal vs. Moderate p-value | Minimal vs. Severe p-value |
|---------------------------------------|----------------------|---|------------------------|----|-------------------------|----|-----------------------|------------------------------|----------------------------|
| Domain A Client and Community         | Mean % 2011          | 7 | 78.96(4.55)            | 15 | 75.68(8.48)             | 11 | 76.29(13.71)          | 0.757                        | 0.847                      |
|                                       | Mean % 2016          | 7 | 79.16(6.35)            | 15 | 81.25(5.3)              | 11 | 79.58(9.45)           | 0.792                        | 0.992                      |
|                                       | Mean difference (SD) |   | 0.2(8.05)              |    | 5.23(7.83)              |    | 3.29(6.98)            | 0.331                        | 0.681                      |
| Domain B Human Resources              | Mean % 2011          | 7 | 50.47(6.8)             | 15 | 46.51(5.38)             | 11 | 52.54(6.28)           | 0.332                        | 0.758                      |
|                                       | Mean % 2016          | 7 | 57.97(4.64)            | 15 | 54.15(8.85)             | 11 | 56.85(6.22)           | 0.498                        | 0.948                      |
|                                       | Mean difference (SD) |   | 7.5(5.23)              |    | 7.06(9.41)              |    | 4.32(6.81)            | 0.992                        | 0.685                      |
| Domain C Physical Capacity            | Mean % 2011          | 7 | 33.59(2.75)            | 15 | 36.2(8.23)              | 11 | 41.35(9.12)           | 0.747                        | 0.116                      |
|                                       | Mean % 2016          | 7 | 76.56(4.93)            | 15 | 77.95(9.15)             | 11 | 77.61(8.58)           | 0.927                        | 0.963                      |
|                                       | Mean difference (SD) |   | 42.97(3.75)            |    | 41.37(11.83)            |    | 36.26(14.42)          | 0.952                        | 0.472                      |
| Domain D Quality of Service Provision | Mean % 2011          | 7 | 46.33(7.69)            | 15 | 50.68(8.55)             | 11 | 51.2(8.12)            | 0.489                        | 0.449                      |
|                                       | Mean % 2016          | 7 | 58.99(9.21)            | 15 | 60.54(12.65)            | 11 | 60.17(9.09)           | 0.947                        | 0.973                      |
|                                       | Mean difference (SD) |   | 12.66(11.89)           |    | 9.46(14.17)             |    | 8.97(8)               | 0.830                        | 0.801                      |
| Domain E Management Systems           | Mean % 2011          | 7 | 42.33(3.9)             | 15 | 43.23(8.24)             | 11 | 53.95(18.23)          | 0.985                        | 0.132                      |
|                                       | Mean % 2016          | 7 | 51.13(14.53)           | 15 | 50.35(14.7)             | 11 | 54.68(13.35)          | 0.992                        | 0.865                      |
|                                       | Mean difference (SD) |   | 8.8(12.95)             |    | 5.53(8.12)              |    | 0.74(8.74)            | 0.733                        | 0.200                      |
| Domain F Overall Mission              | Mean % 2011          | 7 | 46.41(2.47)            | 15 | 48.15(3.53)             | 11 | 47.48(4.28)           | 0.553                        | 0.816                      |
|                                       | Mean % 2016          | 7 | 41.47(7.41)            | 15 | 42.6(11.3)              | 11 | 50.39(11.06)          | 0.969                        | 0.200                      |
|                                       | Mean difference (SD) |   | -4.94(6.23)            |    | -5.95(11.15)            |    | 2.91(11.27)           | 0.975                        | 0.277                      |

|                               |                         |   |            |    |             |    |              |       |       |
|-------------------------------|-------------------------|---|------------|----|-------------|----|--------------|-------|-------|
| Overall Means<br>(Provincial) | Mean % 2011             | 7 | 54.6(4.29) | 15 | 54.55(4.9)  | 11 | 56.53(10.41) | 0.999 | 0.843 |
|                               | Mean % 2016             | 7 | 62.21(4.6) | 15 | 62.38(7.19) | 11 | 65.36(7.65)  | 0.998 | 0.620 |
|                               | Mean difference<br>(SD) |   | 7.61(4.71) |    | 7.24(6.43)  |    | 8.84(13.7)   | 0.996 | 0.960 |



**eTable 10. Crude and Multivariable Analysis of Conflict Association With Health Systems Indicators A, From 2004-2010**

| Equipment functionality index | Bivariate |               |         | Main Effect model w/o covariates |               |         | Adjusted |                |         |
|-------------------------------|-----------|---------------|---------|----------------------------------|---------------|---------|----------|----------------|---------|
|                               | Coef.     | 95% CI        | p,value | Coef.                            | 95% CI        | p,value | Coef.    | 95% CI         | p,value |
| <b>Conflict Type</b>          |           |               |         |                                  |               |         |          |                |         |
| 0=Minimal                     | ref.      |               |         | ref.                             |               |         | ref.     |                |         |
| 1=Moderate                    | 4.91      | (2.90,6.91)   | <.0001  | 14.76                            | (5.10,24.42)  | 0.003   | 11.12    | (1.57,20.67)   | 0.022   |
| 2=Severe                      | 8.93      | (3.40,14.46)  | <.0001  | 70.90                            | (19.85,122.0) | 0.01    | 62.40    | (12.74,112.07) | 0.01    |
| <b>Year</b>                   | 5.17      | (4.76,5.57)   | <.0001  | 5.79                             | (5.34,6.25)   | <.0001  | 6.03     | (5.56,6.49)    | 0.00    |
| <b>Conflict Type 1*time</b>   |           |               |         | ,3.71                            | (5.56,-1.86)  | <.0001  | -3.26    | (-5.07,1.45)   | <.0001  |
| <b>Conflict Type 2*time</b>   |           |               |         | ,13.45                           | (22.71,-4.18) | <.0001  | -12.37   | (-21.38,3.36)  | 0.01    |
| <b>Patient volume</b>         | 37.79     | (31.88,43.71) | <.0001  |                                  |               |         | 5.75     | (-0.82,12.32)  | 0.086   |
| <b>Facility Type</b>          |           |               |         |                                  |               |         |          |                |         |
| BHC                           | ref.      |               |         |                                  |               |         | ref.     |                |         |
| CHC                           | 8.40      | (6.77,10.03)  | <.0001  |                                  |               |         | 8.48     | (6.90,10.06)   | <.0001  |
| Subcenter                     | 12.86     | (9.78,15.93)  | <.0001  |                                  |               |         | 11.50    | (8.20,14.81)   | <.0001  |
| <b>Region</b>                 |           |               |         |                                  |               |         |          |                |         |
| Central                       | ref.      |               |         |                                  |               |         | ref.     |                |         |
| Central Highlands             | 3.71      | (-0.91,8.32)  | 0.116   |                                  |               |         | 5.43     | (1.16,9.70)    | 0.013   |
| East                          | 1.52      | (-1.19,4.22)  | 0.273   |                                  |               |         | 1.44     | (-1.15,4.03)   | 0.276   |

|                      |       |                |        |  |  |  |       |                |        |
|----------------------|-------|----------------|--------|--|--|--|-------|----------------|--------|
| North                | -0.25 | (-2.95,2.44)   | 0.854  |  |  |  | -0.14 | (-2.68-2.39)   | 0.912  |
| North East           | -3.81 | (-6.60,-1.02)  | 0.007  |  |  |  | -3.28 | (-5.94,-0.61)  | 0.02   |
| South                | -6.83 | (-10.32,-3.34) | <.0001 |  |  |  | -8.80 | (-12.02,-5.57) | <.0001 |
| South East           | -2.52 | (-5.33,0.30)   | 0.08   |  |  |  | -3.13 | (-5.75,-0.50)  | 0.02   |
| West                 | 0.34  | (-2.50,3.18)   | 0.816  |  |  |  | 0.36  | (-2.19,2.91)   | 0.783  |
| <b>Province Type</b> |       |                |        |  |  |  |       |                |        |
| Contracting In       | ref.  |                |        |  |  |  | ref.  |                |        |
| Contracting Out      | -0.64 | (-3.45,2.16)   | 0.653  |  |  |  | 0.58  | (-2.16,3.33)   | 0.68   |

| Drug availability index | Bivariate    |               |                | Main Effect model w/o covariates |               |                | Adjusted     |                |                |
|-------------------------|--------------|---------------|----------------|----------------------------------|---------------|----------------|--------------|----------------|----------------|
|                         | <i>Coef.</i> | <i>95% CI</i> | <i>p-value</i> | <i>Coef.</i>                     | <i>95% CI</i> | <i>p-value</i> | <i>Coef.</i> | <i>95% CI</i>  | <i>p-value</i> |
| <b>Conflict Type</b>    |              |               |                |                                  |               |                |              |                |                |
| 0=Minimal               | ref.         |               |                | ref.                             |               |                | ref.         |                |                |
| 1=Moderate              | -0.35        | (3.11,2.41)   | 0.802          | 0.59                             | (-14.6,15.8)  | 0.939          | -2.93        | (-18.44,12.59) | 0.712          |
| 2=Severe                | 3.10         | (4.56,10.75)  | 0.43           | -68.23                           | (-150,13.4)   | 0.10           | -75.81       | (-157.21,5.59) | 0.068          |

|                             |       |              |       |       |              |       |       |               |       |
|-----------------------------|-------|--------------|-------|-------|--------------|-------|-------|---------------|-------|
| <b>Year</b>                 | 0.52  | (0.14,1.17)  | 0.122 | 0.59  | (-0.14,1.32) | 0.11  | 0.82  | (0.06,1.58)   | 0.04  |
| <b>Conflict Type 1*time</b> |       |              |       | -0.36 | (-3.28,2.57) | 0.810 | 0.18  | (-2.77,3.14)  | 0.903 |
| <b>Conflict Type 2*time</b> |       |              |       | 12.79 | (-2.02,27.6) | 0.091 | 13.81 | (-0.95,28.57) | 0.067 |
| <b>Patient volume</b>       | -3.80 | (11.95,4.35) | 0.361 |       |              |       | -9.35 | (-19.67,0.96) | 0.076 |
| <b>Facility Type</b>        |       |              |       |       |              |       |       |               |       |
| BHC                         | ref.  |              |       |       |              |       | ref.  |               |       |
| CHC                         | 0.07  | (-2.10,2.25) | 0.948 |       |              |       | 0.82  | (-1.46,3.10)  | 0.48  |
| Subcenter                   | 1.89  | (-2.25,6.02) | 0.371 |       |              |       | 3.92  | (-1.05,8.89)  | 0.12  |
| <b>Region</b>               |       |              |       |       |              |       |       |               |       |
| Central                     | ref.  |              |       |       |              |       | ref.  |               |       |
| Central Highlands           | -3.48 | (-9.09,2.13) | 0.224 |       |              |       | -1.96 | (-7.92,4.00)  | 0.52  |
| East                        | 0.91  | (-2.45,4.28) | 0.595 |       |              |       | 1.26  | (-2.43,4.94)  | 0.504 |
| North                       | -2.45 | (-5.75,0.84) | 0.145 |       |              |       | -2.10 | (-5.64,1.44)  | 0.245 |
| North East                  | -0.19 | (-3.64,3.25) | 0.912 |       |              |       | -0.02 | (-3.80,3.77)  | 0.99  |

|                      |       |               |        |  |  |  |       |                |        |
|----------------------|-------|---------------|--------|--|--|--|-------|----------------|--------|
| South                | -0.74 | (-5.05,3.56)  | 0.735  |  |  |  | -0.53 | (-5.07,4.00)   | 0.82   |
| South East           | -8.84 | (-12.32 5.35) | <.0001 |  |  |  | -8.57 | (-12.29, 4.86) | <.0001 |
| West                 | 1.91  | (-1.58,5.39)  | 0.284  |  |  |  | 2.15  | (-1.42,5.72)   | 0.237  |
| <b>Province Type</b> |       |               |        |  |  |  |       |                |        |
| Contracting In       | ref.  |               |        |  |  |  | ref.  |                |        |
| Contracting Out      | -3.10 | (-6.55,0.35)  | 0.078  |  |  |  | -1.15 | (-4.98,2.69)   | 0.56   |

| Infrastructure index | Bivariate    |               |                | Main Effect model w/o covariates |                 |                | Adjusted     |                 |                |
|----------------------|--------------|---------------|----------------|----------------------------------|-----------------|----------------|--------------|-----------------|----------------|
|                      | <i>Coef.</i> | <i>95% CI</i> | <i>p-value</i> | <i>Coef.</i>                     | <i>95% CI</i>   | <i>p-value</i> | <i>Coef.</i> | <i>95% CI</i>   | <i>p-value</i> |
| <b>Conflict Type</b> |              |               |                |                                  |                 |                |              |                 |                |
| 0=Minimal            | ref.         |               |                | ref.                             |                 |                | ref.         |                 |                |
| 1=Moderate           | 6.64         | (3.96,9.32)   | <.0001         | 12.86                            | (-0.56,26.28)   | 0.060          | 11.78        | (-1.42,24.99)   | 0.08           |
| 2=Severe             | 11.85        | (4.47,19.23)  | 0.002          | -38.64                           | (-108.50,31.22) | 0.278          | -35.17       | (-103.39,33.04) | 0.312          |
| <b>Year</b>          |              |               |                | 4.27                             | (3.65,4.89)     | <.0001         | 3.50         | (2.86,4.13)     | <.0001         |

|                             |       |                |        |  |       |               |       |       |                |        |
|-----------------------------|-------|----------------|--------|--|-------|---------------|-------|-------|----------------|--------|
| <b>Conflict Type 1*time</b> |       |                |        |  | -2.75 | (-5.29,-0.20) | 0.035 | -2.26 | (-4.75,0.24)   | 0.077  |
| <b>Conflict Type 2*time</b> |       |                |        |  | 7.27  | (-5.40,19.94) | 0.261 | 6.99  | (-5.38,19.36)  | 0.268  |
| <b>Patient volume</b>       | 68.98 | (60.57,77.38)  | <.0001 |  |       |               |       | 27.52 | (18.16,36.88)  | <.0001 |
| <b>Facility Type</b>        |       |                |        |  |       |               |       |       |                |        |
| BHC                         | ref.  |                |        |  |       |               |       | ref.  |                |        |
| CHC                         | 20.20 | (17.71,22.69)  | <.0001 |  |       |               |       | 18.69 | (16.21,21.16)  | <.0001 |
| Subcenter                   | 36.41 | (31.82,40.99)  | <.0001 |  |       |               |       | 29.54 | (24.56,34.53)  | <.0001 |
| <b>Region</b>               |       |                |        |  |       |               |       |       |                |        |
| Central                     | ref.  |                |        |  |       |               |       | ref.  |                |        |
| Central Highlands           | -7.68 | (-16.22,0.86)  | 0.078  |  |       |               |       | -7.19 | (-14.14,-0.23) | 0.043  |
| East                        | -2.56 | (-7.4,2.29)    | 0.301  |  |       |               |       | -1.06 | (-5.22,3.09)   | 0.616  |
| North                       | -1.46 | (-6.41,3.48)   | 0.562  |  |       |               |       | 2.79  | (-1.35,6.92)   | 0.187  |
| North East                  | 0.24  | (-4.79,5.26)   | 0.926  |  |       |               |       | 1.81  | (-2.48,6.10)   | 0.408  |
| South                       | -1.61 | (-7.94,4.72)   | 0.618  |  |       |               |       | 0.02  | (-5.24,5.20)   | 0.995  |
| South East                  | -5.22 | (-10.27,-0.16) | 0.043  |  |       |               |       | 2.97  | (-7.21,1.28)   | 0.171  |
| West                        | -9.04 | (-14.21,-3.86) | 0.001  |  |       |               |       | 7.04  | (-11.18,-2.89) | 0.001  |
| <b>Province Type</b>        |       |                |        |  |       |               |       |       |                |        |

|                 |       |               |       |  |  |  |       |                |       |
|-----------------|-------|---------------|-------|--|--|--|-------|----------------|-------|
| Contracting In  | ref.  |               |       |  |  |  | ref.  |                |       |
| Contracting Out | -3.42 | (-8.53,-1.68) | 0.189 |  |  |  | -5.95 | (-10.43,-1.47) | 0.009 |

| Patient history and physical examination | Bivariate |               |         | Main Effect model w/o covariates |                |         | Adjusted |                |         |
|------------------------------------------|-----------|---------------|---------|----------------------------------|----------------|---------|----------|----------------|---------|
|                                          | Coef.     | 95% CI        | p-value | Coef.                            | 95% CI         | p-value | Coef.    | 95% CI         | p-value |
| <b>Conflict Type</b>                     |           |               |         |                                  |                |         |          |                |         |
| 0=Minimal                                | ref.      |               |         | ref.                             |                |         | ref.     |                |         |
| 1=Moderate                               | -5.18     | (-6.94,-3.42) | <.0001  | -16.30                           | (-25.18,-7.43) | <.0001  | -12.15   | (-21.34,-2.96) | 0.01    |
| 2=Severe                                 | -4.11     | (-9.00,0.77)  | 0.099   | 39.33                            | (-12.57,91.24) | 0.137   | 12.06    | (-36.39,60.51) | 0.626   |
| <b>Year</b>                              |           |               |         | 2.78                             | (2.32,3.23)    | <.0001  | 1.64     | (1.18,2.09)    | <.0001  |
| <b>Conflict Type 1*time</b>              |           |               |         | 1.37                             | (-0.35,3.09)   | 0.119   | 0.98     | (-0.77,2.74)   | 0.271   |
| <b>Conflict Type 2*time</b>              |           |               |         | -8.83                            | (-18.21,0.56)  | 0.065   | -4.00    | (-12.79,4.79)  | 0.372   |
| <b>Patient volume</b>                    | 4.88      | (-0.11,9.87)  | 0.055   |                                  |                |         | 0.13     | (-5.97,6.23)   | 0.967   |
| <b>Facility Type</b>                     |           |               |         |                                  |                |         |          |                |         |

|                      |       |               |        |  |  |  |       |                |       |
|----------------------|-------|---------------|--------|--|--|--|-------|----------------|-------|
| BHC                  | ref.  |               |        |  |  |  | ref.  |                |       |
| CHC                  | 0.66  | (-0.69,2.00)  | 0.340  |  |  |  | 0.82  | (-0.45,2.08)   | 0.206 |
| Subcenter            | -1.29 | (-3.83,1.25)  | 0.321  |  |  |  | 0.45  | (-2.38,3.29)   | 0.754 |
| <b>Region</b>        |       |               |        |  |  |  |       |                |       |
| Central              | ref.  |               |        |  |  |  | ref.  |                |       |
| Central Highlands    | -6.14 | (-9.35,-2.93) | <.0001 |  |  |  | -3.43 | (-6.66,-0.21)  | 0.037 |
| East                 | 2.11  | (0.13,4.08)   | 0.037  |  |  |  | 2.57  | (0.55,4.60)    | 0.013 |
| North                | -0.89 | (-2.79,1.01)  | 0.357  |  |  |  | -1.54 | (-3.47,0.38)   | 0.115 |
| North East           | -7.36 | (-9.36,-5.35) | <.0001 |  |  |  | -5.94 | (-8.01,-3.86)  | 0     |
| South                | -5.94 | (-8.46,-3.42) | <.0001 |  |  |  | -8.02 | (-10.49,-5.55) | 0     |
| South East           | -3.06 | (-5.11,-1.01) | 0.003  |  |  |  | -4.42 | (-6.46,-2.39)  | 0     |
| West                 | 2.10  | (0.07-4.13)   | 0.042  |  |  |  | 0.50  | (-1.44,-2.44)  | 0.614 |
| <b>Province Type</b> |       |               |        |  |  |  |       |                |       |
| Contracting In       | ref.  |               |        |  |  |  | ref.  |                |       |
| Contracting Out      | -4.85 | (-6.9,-2.79)  | <.0001 |  |  |  | -2.68 | (-4.76,-0.60)  | 0.012 |

| Patient counseling index    | Bivariate |                |         | Main Effect model w/o covariates |                |         | Adjusted |                 |         |
|-----------------------------|-----------|----------------|---------|----------------------------------|----------------|---------|----------|-----------------|---------|
|                             | Coef.     | 95% CI         | p-value | Coef.                            | 95% CI         | p-value | Coef.    | 95% CI          | p-value |
| <b>Conflict Type</b>        |           |                |         |                                  |                |         |          |                 |         |
| 0=Minimal                   | ref.      |                |         | ref.                             |                |         | ref.     |                 |         |
| 1=Moderate                  | -6.44     | (-8.75,-4.13)  | <.0001  | -9.83                            | (-21.68,2.03)  | 0.104   | -0.49    | (-13.69,12.71)  | 0.942   |
| 2=Severe                    | -8.04     | (-14.43,-1.65) | 0.014   | -27.14                           | (-96.25,41.97) | 0.441   | -47.32   | (-116.89,22.25) | 0.182   |
| <b>Year</b>                 |           |                |         | 1.49                             | (0.88,2.09)    | <.0001  | 0.81     | (0.15,1.47)     | 0.016   |
| <b>Conflict Type 1*time</b> |           |                |         | 0.22                             | (-2.07,2.51)   | 0.850   | -0.92    | (-3.44,1.60)    | 0.474   |
| <b>Conflict Type 2*time</b> |           |                |         | 2.95                             | (-9.54,15.45)  | 0.643   | 6.85     | (-5.77,19.46)   | 0.288   |
| <b>Patient volume</b>       | 3.99      | (-3.07-11.04)  | 0.268   |                                  |                |         | 1.59     | (-7.18,10.37)   | 0.722   |
| <b>Facility Type</b>        |           |                |         |                                  |                |         |          |                 |         |
| BHC                         | ref.      |                |         |                                  |                |         | ref.     |                 |         |
| CHC                         | 0.42      | (-1.39-2.23)   | 0.648   |                                  |                |         | 0.71     | (-1.12,2.53)    | 0.45    |
| Subcenter                   | -0.95     | (-4.35-2.44)   | 0.582   |                                  |                |         | -0.65    | (-4.73,3.43)    | 0.75    |
| <b>Region</b>               |           |                |         |                                  |                |         |          |                 |         |
| Central                     | ref.      |                |         |                                  |                |         | ref.     |                 |         |



|                      |         |                  |        |  |  |  |        |                 |       |
|----------------------|---------|------------------|--------|--|--|--|--------|-----------------|-------|
| Central Highlands    | -17.81  | (-22.2,-13.41)   | <.0001 |  |  |  | -14.99 | (-19.65,-10.33) | 0     |
| East                 | -4.26   | (-6.93,-1.58)    | 0.002  |  |  |  | -2.47  | (-5.39,0.46)    | 0.098 |
| North                | -3.31   | (-5.9,-0.72)     | 0.012  |  |  |  | -2.59  | (-5.37,0.19)    | 0.068 |
| North East           | -8.93   | (-11.66,-6.21)   | <.0001 |  |  |  | -6.87  | (-9.87,3.88)    | 0     |
| South                | -10.56  | (-13.99,-7.13)   | <.0001 |  |  |  | -10.76 | (-14.32,-7.19)  | 0     |
| South East           | -7.59   | (-10.37,-4.8)    | <.0001 |  |  |  | -7.31  | (-10.25,-4.37)  | 0     |
| West                 | -2.82   | (-5.58,-0.05)    | 0.046  |  |  |  | -3.29  | (-6.10,-0.48)   | 0.022 |
| <b>Province Type</b> | -106.19 | (-188.38,-24.01) | 0.011  |  |  |  |        |                 |       |
| Contracting In       | ref.    |                  |        |  |  |  | ref.   |                 |       |
| Contracting Out      | -9.34   | (-12.07,-6.62)   | <.0001 |  |  |  | -5.19  | (-8.20,-2.18)   | 0.001 |

**B, From 2011-2016**

| Equipment Functionality Index | Bivariate |        |         | Main Effect model w/o covariates |        |         | Adjusted |        |         |
|-------------------------------|-----------|--------|---------|----------------------------------|--------|---------|----------|--------|---------|
|                               | Coef.     | 95% CI | p-value | Coef.                            | 95% CI | p-value | Coef.    | 95% CI | p-value |
| <b>Conflict Type</b>          |           |        |         |                                  |        |         |          |        |         |

|                                                                  |       |               |        |      |            |        |       |               |        |
|------------------------------------------------------------------|-------|---------------|--------|------|------------|--------|-------|---------------|--------|
| 0=Minimal                                                        | ref.  |               |        | ref. |            |        | ref.  |               |        |
| 1=Moderate                                                       | 6.8   | (4.6,9.1)     | <.0001 | 6.4  | (3.0,9.7)  | <.0001 | 3.6   | (0.5,6.8)     | 0.025  |
| 2=Severe                                                         | 7.9   | (5.8,10.0)    | <.0001 | 10.1 | (6.9,13.2) | <.0001 | 4.2   | (1.2,7.2)     | 0.007  |
| <b>Year</b>                                                      | 2.3   | (2.1,2.5)     | <.0001 | 2.5  | (2.1,2.9)  | <.0001 | 2.5   | (2.0,2.9)     | <.0001 |
| <b>Conflict Type 1*time</b>                                      | --    |               | --     | 0.1  | (-0.4,0.6) | 0.720  | 0.1   | (-0.4,0.6)    | 0.588  |
| <b>Conflict Type 2*time</b>                                      | --    |               | --     | -0.4 | (-0.9,0.1) | 0.111  | -0.4  | (-0.9,0.1)    | 0.105  |
| <b>Patient volume (10,000s)</b>                                  | -0.1  | (-0.2,-0.1)   | <.0001 |      |            |        | -0.2  | (-0.2,-0.1)   | <.0001 |
| <b>Facility Type</b>                                             |       |               |        |      |            |        |       |               |        |
| BHC                                                              | ref.  |               |        |      |            |        | ref.  |               |        |
| CHC                                                              | 4.4   | (2.9,5.9)     | <.0001 |      |            |        | 4     | (2.7,5.3)     | <.0001 |
| Subcenter                                                        | -14.4 | (-15.9,-12.9) | <.0001 |      |            |        | -13.7 | (-15.1,-12.3) | <.0001 |
| <b>Distance of facility in KM from provincial center (1000s)</b> | -9.6  | (-14.0,-5.3)  | 0.001  |      |            |        | -5.6  | (-9.4,-1.8)   | 0.004  |
| <b>Region</b>                                                    |       |               |        |      |            |        |       |               |        |
| Central                                                          | ref.  |               |        |      |            |        | ref.  |               |        |
| Central Highlands                                                | 6.3   | (3.1,9.6)     | <.0001 |      |            |        | 2.7   | (0.0,5.5)     | 0.049  |
| East                                                             | -1.2  | (-3.7,1.4)    | 0.374  |      |            |        | -1.7  | (-3.9,0.5)    | 0.138  |
| North                                                            | 0.1   | (-2.6,2.8)    | 0.937  |      |            |        | -2.8  | (-5.0,-0.6)   | 0.013  |
| North East                                                       | -0.2  | (-2.8,2.3)    | 0.851  |      |            |        | -0.5  | (-2.7,1.7)    | 0.650  |
| South                                                            | -7.6  | (-10.1,-5.0)  | <.0001 |      |            |        | -7.6  | (-9.9,-5.4)   | <.0001 |
| South East                                                       | 1.1   | (-1.6,3.8)    | 0.414  |      |            |        | -0.3  | (-2.7,2.0)    | 0.775  |
| West                                                             | -3.2  | (-5.7,-0.8)   | 0.01   |      |            |        | -2.9  | (-4.9,-0.9)   | 0.004  |
| <b>Province Type</b>                                             |       |               |        |      |            |        |       |               |        |
| Contracting In                                                   | ref.  |               |        |      |            |        | ref.  |               |        |
| Contracting Out                                                  | 8.4   | (5.9,11.0)    | <.0001 |      |            |        | 7.7   | (5.1,10.2)    | <.0001 |

| Pharmaceuticals and Vaccines Availability Index | Bivariate | Main Effect model w/o covariates | Adjusted |
|-------------------------------------------------|-----------|----------------------------------|----------|
|-------------------------------------------------|-----------|----------------------------------|----------|

|                                                                  | <i>Coef.</i> | <i>95% CI</i> | <i>p-value</i> | <i>Coef.</i> | <i>95% CI</i> | <i>p-value</i> | <i>Coef.</i> | <i>95% CI</i> | <i>p-value</i> |
|------------------------------------------------------------------|--------------|---------------|----------------|--------------|---------------|----------------|--------------|---------------|----------------|
| <b>Conflict Type</b>                                             |              |               |                |              |               |                |              |               |                |
| 0=Minimal                                                        | ref.         |               |                | ref.         |               |                | ref.         |               |                |
| 1=Moderate                                                       | 10.7         | (8.4,13.0)    | <.0001         | 1.6          | (-2.1,5.4)    | 0.393          | -5.0         | (-8.5,-1.5)   | 0.005          |
| 2=Severe                                                         | 12.5         | (10.3,14.7)   | <.0001         | 5.5          | (1.9,9.0)     | <.0001         | -4.7         | (-8.1,-1.4)   | 0.005          |
| <b>Year</b>                                                      | 0.3          | (0.1,0.5)     | 0.010          | -1.1         | (-1.6,-0.6)   | <.0001         | -1.1         | (-1.6,-0.6)   | <.0001         |
| <b>Conflict Type 1*time</b>                                      | --           |               | --             | 1.9          | (1.3,2.4)     | <.0001         | 1.9          | (1.3,2.4)     | <.0001         |
| <b>Conflict Type 2*time</b>                                      | --           |               | --             | 1.4          | (0.9,2.0)     | <.0001         | 1.5          | (0.9,2.0)     | <.0001         |
| <b>Patient volume (10,000s)</b>                                  | -0.3         | (-0.3,-0.2)   | <.0001         |              |               |                | -0.3         | (-0.3,-0.2)   | <.0001         |
| <b>Facility Type</b>                                             |              |               |                |              |               |                |              |               |                |
| BHC                                                              | ref.         |               |                |              |               |                | ref.         |               |                |
| CHC                                                              | 6.6          | (5.0,8.2)     | <.0001         |              |               |                | 6.4          | (5.0,7.7)     | <.0001         |
| Subcenter                                                        | -12.2        | (-13.8,-10.5) | <.0001         |              |               |                | -11.4        | (-12.8,-10.0) | <.0001         |
| <b>Distance of facility in KM from provincial center (1000s)</b> | -6.4         | (-11.0,-1.7)  | 0.007          |              |               |                | -3.6         | (-7.9,0.7)    | 0.100          |
| <b>Region</b>                                                    |              |               |                |              |               |                |              |               |                |
| Central                                                          | ref.         |               |                |              |               |                | ref.         |               |                |
| Central Highlands                                                | 10.2         | (6.8,13.6)    | <.0001         |              |               |                | 2.5          | (-0.3,5.2)    | 0.077          |
| East                                                             | 2.6          | (0.0,5.3)     | 0.054          |              |               |                | -1.9         | (-4.1,0.4)    | 0.103          |
| North                                                            | 7.1          | (4.2,9.9)     | <.0001         |              |               |                | 0.6          | (-1.6,2.9)    | 0.581          |
| North East                                                       | 4.0          | (1.3,6.6)     | 0.004          |              |               |                | -0.4         | (-2.7,1.8)    | 0.730          |
| South                                                            | -3.2         | (-5.9,-0.5)   | 0.020          |              |               |                | -6.9         | (-9.2,-4.7)   | <.0001         |
| South East                                                       | 4.8          | (2.0,7.7)     | 0.001          |              |               |                | -0.9         | (-3.4,1.5)    | 0.442          |
| West                                                             | 1.0          | (-1.6,3.5)    | 0.463          |              |               |                | -0.9         | (-2.9,1.1)    | 0.368          |
| <b>Province Type</b>                                             |              |               |                |              |               |                |              |               |                |
| Contracting In                                                   | ref.         |               |                |              |               |                | ref.         |               |                |
| Contracting Out                                                  | 19.4         | (16.9,21.9)   | <.0001         |              |               |                | 18.1         | (16.9,21.9)   | <.0001         |

| Functional infrastructure index                                  | Bivariate |               |         | Main Effect model w/o covariates |             |         | Adjusted |               |         |
|------------------------------------------------------------------|-----------|---------------|---------|----------------------------------|-------------|---------|----------|---------------|---------|
|                                                                  | Coef.     | 95% CI        | p-value | Coef.                            | 95% CI      | p-value | Coef.    | 95% CI        | p-value |
| <b>Conflict Type</b>                                             |           |               |         |                                  |             |         |          |               |         |
| 0=Minimal                                                        | ref.      |               |         |                                  |             |         |          |               |         |
| 1=Moderate                                                       | 4.8       | (1.1,8.6)     | 0.011   | 6.4                              | (0.8,12.0)  | 0.025   | 8.0      | (2.3,13.6)    | 0.006   |
| 2=Severe                                                         | 7.8       | (4.3,11.3)    | <0.001  | 15.3                             | (10.0,20.6) | <.0001  | 13.9     | (8.5,19.4)    | <.0001  |
| <b>Year</b>                                                      | 1.0       | (0.8,1.3)     | <0.001  | 1.9                              | (1.2,2.6)   | <.0001  | 2.0      | (1.3,2.7)     | <0.001  |
| <b>Conflict Type 1*time</b>                                      | --        |               | --      | -0.3                             | (-1.2,0.5)  | 0.464   | -0.4     | (-1.2,0.5)    | 0.408   |
| <b>Conflict Type 2*time</b>                                      | --        |               | --      | -1.5                             | (-2.3,-0.7) | <.0001  | -1.6     | (-2.4,-0.8)   | <.0001  |
| <b>Patient volume (10,000s)</b>                                  | -0.1      | (-0.2,0.0)    | 0.006   |                                  |             |         | -0.1     | (-0.2,0.0)    | 0.007   |
| <b>Facility Type</b>                                             |           |               |         |                                  |             |         |          |               |         |
| BHC                                                              | ref.      |               |         |                                  |             |         | ref.     |               |         |
| CHC                                                              | 6.2       | (3.5,8.9)     | <.0001  |                                  |             |         | 5.5      | (2.9,8.1)     | <.0001  |
| Subcenter                                                        | -12.1     | (-14.9,-9.4)  | <.0001  |                                  |             |         | -10.9    | (-13.5,-8.3)  | <.0001  |
| <b>Distance of facility in KM from provincial center (1000s)</b> | -22.3     | (-29.0,-15.6) | <.0001  |                                  |             |         | -14.6    | (-21.2,-8.0)  | <.0001  |
| <b>Region</b>                                                    |           |               |         |                                  |             |         |          |               |         |
| Central                                                          | ref.      |               |         |                                  |             |         | ref.     |               |         |
| Central Highlands                                                | 1.7       | (-3.5,7.0)    | 0.517   |                                  |             |         | -0.1     | (-5.5,5.3)    | 0.969   |
| East                                                             | -15.7     | (-19.8,-11.6) | <.0001  |                                  |             |         | -12.7    | (-17.0,-8.4)  | <.0001  |
| North                                                            | -8.8      | (-13.1,-4.5)  | <.0001  |                                  |             |         | -9.0     | (-13.4,-4.7)  | <.0001  |
| North East                                                       | -0.6      | (-4.7,3.5)    | 0.765   |                                  |             |         | 2.2      | (-2.1,6.6)    | 0.320   |
| South                                                            | -19.6     | (-23.8,-15.5) | <.0001  |                                  |             |         | -15.5    | (-19.9,-11.2) | <.0001  |
| South East                                                       | -7.6      | (-11.9,-3.3)  | 0.001   |                                  |             |         | -7.2     | (-11.8,-2.6)  | 0.002   |
| West                                                             | -12.5     | (-16.4,-8.5)  | <.0001  |                                  |             |         | -10.3    | (-14.1,-6.4)  | <.0001  |
| <b>Province Type</b>                                             |           |               |         |                                  |             |         |          |               |         |
| Contracting In                                                   | ref.      |               |         |                                  |             |         | ref.     |               |         |
| Contracting Out                                                  | -3.8      | (-8.0,0.5)    | 0.081   |                                  |             |         | -2.9     | (-7.9,2.1)    | 0.250   |

| Client Background and Physical Assessment Index                  | Bivariate    |               |                | Main Effect model w/o covariates |               |                | Adjusted     |               |                |
|------------------------------------------------------------------|--------------|---------------|----------------|----------------------------------|---------------|----------------|--------------|---------------|----------------|
|                                                                  | <i>Coef.</i> | <i>95% CI</i> | <i>p-value</i> | <i>Coef.</i>                     | <i>95% CI</i> | <i>p-value</i> | <i>Coef.</i> | <i>95% CI</i> | <i>p-value</i> |
| <b>Conflict Type</b>                                             |              |               |                |                                  |               |                |              |               |                |
| 0=Minimal                                                        | ref.         |               |                | ref.                             |               |                | ref.         |               |                |
| 1=Moderate                                                       | 5.2          | (3.8,6.7)     | 0.04           | 3.5                              | (0.6,6.5)     | 0.019          | 5            | (2.0,8.0)     | 0.001          |
| 2=Severe                                                         | 3.7          | (2.4,5.1)     | <.0001         | 8.8                              | (6.0,11.6)    | <.0001         | 9.3          | (6.4,12.2)    | <.0001         |
| <b>Year</b>                                                      | 0.8          | (0.6,1.0)     | <.0001         | 1.2                              | (0.8,1.6)     | <.0001         | 1.2          | (0.8,1.7)     | <.0001         |
| <b>Conflict Type 1*time</b>                                      | --           |               | --             | 0.3                              | (-0.2,0.9)    | 0.200          | 0.4          | (-0.2,0.9)    | 0.18           |
| <b>Conflict Type 2*time</b>                                      | --           |               | --             | -1                               | (-1.5,-0.5)   | <.0001         | -1.0         | (-1.5,-0.5)   | <.0001         |
| <b>Patient volume (10,000s)</b>                                  | <0.1         | (0.0,0.1)     | 0.004          |                                  |               |                | <0.1         | (-0.1,0.0)    | 0.938          |
| <b>Facility Type</b>                                             |              |               |                |                                  |               |                |              |               |                |
| BHC                                                              | ref.         |               |                |                                  |               |                | ref.         |               |                |
| CHC                                                              | 1.3          | (0.1,2.5)     | 0.028          |                                  |               |                | 1.4          | (0.3,2.5)     | 0.01           |
| Subcenter                                                        | 0.1          | (-1.1,1.3)    | 0.898          |                                  |               |                | 0.4          | (-0.7,1.6)    | 0.48           |
| <b>Distance of facility in KM from provincial center (1000s)</b> | 1.4          | (-2.4,5.2)    | 0.47           |                                  |               |                | 5.9          | (2.1,9.7)     | 0.002          |
| <b>Region</b>                                                    |              |               |                |                                  |               |                |              |               |                |
| Central                                                          | ref.         |               |                |                                  |               |                | ref.         |               |                |
| Central Highlands                                                | 2.2          | (0.2,4.3)     | 0.033          |                                  |               |                | 3.9          | (1.7,6.1)     | 0.001          |
| East                                                             | -0.2         | (-1.9,1.5)    | 0.797          |                                  |               |                | 1.8          | (0.0,3.6)     | 0.057          |
| North                                                            | -0.1         | (-1.8,1.7)    | 0.925          |                                  |               |                | 0.4          | (-1.4,2.2)    | 0.68           |
| North East                                                       | -0.5         | (-2.2,1.1)    | 0.54           |                                  |               |                | 1.8          | (0.0,3.6)     | 0.06           |
| South                                                            | -5.4         | (-7.1,-3.7)   | <.0001         |                                  |               |                | -4.8         | (-6.6,-3.0)   | <.0001         |
| South East                                                       | -1.5         | (-3.3,0.3)    | 0.108          |                                  |               |                | 0.1          | (-1.9,2.0)    | 0.956          |
| West                                                             | -2.1         | (-3.7,-0.5)   | 0.011          |                                  |               |                | -2.0         | (-3.6,-0.4)   | 0.016          |
| <b>Province Type</b>                                             |              |               |                |                                  |               |                |              |               |                |
| Contracting In                                                   | ref.         |               |                |                                  |               |                | ref.         |               |                |
| Contracting Out                                                  | -0.3         | (-1.9,1.4)    | 0.75           |                                  |               |                | -3.4         | (-5.4,-1.4)   | 0.001          |

| Client Counseling Index                                          | Bivariate |             |         | Main Effect model w/o covariates |            |         | Adjusted |              |         |
|------------------------------------------------------------------|-----------|-------------|---------|----------------------------------|------------|---------|----------|--------------|---------|
|                                                                  | Coef.     | 95% CI      | p-value | Coef.                            | 95% CI     | p-value | Coef.    | 95% CI       | p-value |
| <b>Conflict Type</b>                                             |           |             |         |                                  |            |         |          |              |         |
| 0=Minimal                                                        | ref       |             |         | ref                              |            |         | ref      |              |         |
| 1=Moderate                                                       | 8.2       | (5.9,10.5)  | <.0001  | -2.7                             | (-7.5,2.1) | 0.272   | -0.4     | (-5.3,4.6)   | 0.881   |
| 2=Severe                                                         | 6.2       | (4.0,8.4)   | <.0001  | 5.7                              | (1.2,10.2) | 0.010   | 7.0      | (2.3,11.7)   | <.0001  |
| <b>Year</b>                                                      | 2.8       | (2.5,3.1)   | <.0001  | 2                                | (1.3,2.7)  | <.0001  | 2.0      | (1.3,2.7)    | <.0001  |
| <b>Conflict Type 1*time</b>                                      | --        |             | --      | 2.2                              | (1.4,3.1)  | <.0001  | 2.2      | (1.4,3.1)    | <.0001  |
| <b>Conflict Type 2*time</b>                                      | --        |             | --      | 0.2                              | (-0.6,1.0) | 0.670   | 0.1      | (-0.7,0.9)   | 0.733   |
| <b>Patient volume (10,000s)</b>                                  | 0.1       | (0.0,0.2)   | 0.049   |                                  |            |         | 0.1      | (0.0,0.1)    | 0.123   |
| <b>Facility Type</b>                                             |           |             |         |                                  |            |         |          |              |         |
| BHC                                                              | ref       |             |         |                                  |            |         | ref.     |              |         |
| CHC                                                              | 1.0       | (-0.9,2.8)  | 0.305   |                                  |            |         | 0.9      | (-0.9,2.6)   | 0.330   |
| Subcenter                                                        | -0.6      | (-2.6,1.3)  | 0.520   |                                  |            |         | -0.2     | (-2.0,1.6)   | 0.840   |
| <b>Distance of facility in KM from provincial center (1000s)</b> | 5.1       | (-1.1,11.4) | 0.108   |                                  |            |         | 11.7     | (5.5,17.8)   | <.0001  |
| <b>Region</b>                                                    |           |             |         |                                  |            |         |          |              |         |
| Central                                                          | ref       |             |         |                                  |            |         | ref.     |              |         |
| Central Highlands                                                | 6.9       | (3.7,10.2)  | <.0001  |                                  |            |         | 9.8      | (6.4,13.2)   | <.0001  |
| East                                                             | -1.4      | (-4.1,1.3)  | 0.309   |                                  |            |         | 2.4      | (-0.5,5.3)   | 0.107   |
| North                                                            | 1.0       | (-1.8,3.8)  | 0.472   |                                  |            |         | 2.3      | (-0.5,5.1)   | 0.107   |
| North East                                                       | -1.9      | (-4.6,0.7)  | 0.151   |                                  |            |         | 2.1      | (-0.7,5.0)   | 0.150   |
| South                                                            | -4.9      | (-7.6,-2.3) | <.0001  |                                  |            |         | -3.8     | (-6.7,-0.9)  | 0.010   |
| South East                                                       | -2.5      | (-5.4,0.4)  | 0.086   |                                  |            |         | 0.1      | (-3.0,3.2)   | 0.944   |
| West                                                             | -2.7      | (-5.3,-0.2) | 0.037   |                                  |            |         | -1.9     | (-4.4,0.6)   | 0.145   |
| <b>Province Type</b>                                             |           |             |         |                                  |            |         |          |              |         |
| Contracting In                                                   | ref.      |             |         |                                  |            |         | ref.     |              |         |
| Contracting Out                                                  | -0.9      | (-3.5,1.8)  | 0.523   |                                  |            |         | -7.0     | (-10.2,-3.8) | <.0001  |

| Female health worker Index                                       | Bivariate |            |         | Main Effect model w/o covariates |             |         | Adjusted |              |         |
|------------------------------------------------------------------|-----------|------------|---------|----------------------------------|-------------|---------|----------|--------------|---------|
|                                                                  | Coef.     | 95% CI     | p-value | Coef.                            | 95% CI      | p-value | Coef.    | 95% CI       | p-value |
| <b>Conflict Type</b>                                             |           |            |         |                                  |             |         |          |              |         |
| 0=Minimal                                                        | ref       |            |         | ref                              |             |         | ref      |              |         |
| 1=Moderate                                                       | -2.4      | (-5.0,0.1) | 0.060   | -4.4                             | (-8.5,-0.3) | 0.036   | -6.0     | (-10.3,-1.8) | 0.010   |
| 2=Severe                                                         | -0.8      | (-3.2,1.6) | 0.520   | -1.8                             | (-5.6,2.1)  | 0.370   | -4.4     | (-8.5,-0.3)  | 0.034   |
| <b>Year</b>                                                      | 0.9       | (0.6,1.1)  | <.0001  | 0.6                              | (0.1,1.2)   | 0.030   | 0.6      | (0.1,1.2)    | 0.030   |
| <b>Conflict Type 1*time</b>                                      | --        |            | --      | 0.4                              | (-0.3,1.1)  | 0.235   | 0.4      | (-0.3,1.1)   | 0.232   |
| <b>Conflict Type 2*time</b>                                      | --        |            | --      | 0.2                              | (-0.4,0.8)  | 0.501   | 0.2      | (-0.4,0.8)   | 0.475   |
| <b>Patient volume (10,000s)</b>                                  | <0.01     | (0.0,0.1)  | 0.285   |                                  |             |         | <0.01    | (0.0,0.1)    | 0.159   |
| <b>Facility Type</b>                                             |           |            |         |                                  |             |         |          |              |         |
| BHC                                                              | ref       |            |         |                                  |             |         | ref.     |              |         |
| CHC                                                              | 5.0       | (3.1,6.9)  | <.0001  |                                  |             |         | 4.9      | (3.1,6.8)    | <.0001  |
| Subcenter                                                        | 9.2       | (7.3,11.1) | <.0001  |                                  |             |         | 9.5      | (7.6,11.4)   | <.0001  |
| <b>Distance of facility in KM from provincial center (1000s)</b> | -2.3      | (-7.3,2.8) | 0.378   |                                  |             |         | -3.5     | (-8.5,1.6)   | 0.182   |
| <b>Region</b>                                                    |           |            |         |                                  |             |         |          |              |         |
| Central                                                          | ref       |            |         |                                  |             |         | ref.     |              |         |
| Central Highlands                                                | -0.5      | (-4.2,3.2) | 0.797   |                                  |             |         | -1.4     | (-5.1,2.4)   | 0.475   |
| East                                                             | -0.9      | (-3.8,2.0) | 0.557   |                                  |             |         | -2.8     | (-5.8,0.3)   | 0.075   |
| North                                                            | 3.8       | (0.8,6.9)  | 0.014   |                                  |             |         | 3.6      | (0.5,6.6)    | 0.021   |
| North East                                                       | 5.8       | (2.9,8.6)  | <.0001  |                                  |             |         | 3.5      | (0.5,6.6)    | 0.020   |
| South                                                            | 0.8       | (-2.1,3.7) | 0.576   |                                  |             |         | -1.7     | (-4.8,1.3)   | 0.270   |
| South East                                                       | 5.7       | (2.7,8.8)  | <.0001  |                                  |             |         | 4.8      | (1.6,8.1)    | 0.004   |
| West                                                             | 2.1       | (-0.7,4.8) | 0.143   |                                  |             |         | 1.0      | (-1.8,3.7)   | 0.487   |
| <b>Province Type</b>                                             |           |            |         |                                  |             |         |          |              |         |
| Contracting In                                                   | ref.      |            |         |                                  |             |         | ref.     |              |         |

|                 |     |            |       |  |  |  |     |           |       |
|-----------------|-----|------------|-------|--|--|--|-----|-----------|-------|
| Contracting Out | 2.7 | (-0.2,5.7) | 0.065 |  |  |  | 4.4 | (0.9,7.9) | 0.010 |
|-----------------|-----|------------|-------|--|--|--|-----|-----------|-------|

| Provider knowledge score                                         | Bivariate |             |         | Main Effect model w/o covariates |              |         | Adjusted |              |         |
|------------------------------------------------------------------|-----------|-------------|---------|----------------------------------|--------------|---------|----------|--------------|---------|
|                                                                  | Coef.     | 95% CI      | p-value | Coef.                            | 95% CI       | p-value | Coef.    | 95% CI       | p-value |
| <b>Conflict Type</b>                                             |           |             |         |                                  |              |         |          |              |         |
| 0=Minimal                                                        | ref       |             |         | ref                              |              |         | ref      |              |         |
| 1=Moderate                                                       | -2.9      | (-4.6,-1.1) | 0.001   | -7.3                             | (-10.9,-3.8) | <.0001  | -9.2     | (-12.7,-5.6) | <.0001  |
| 2=Severe                                                         | -1.7      | (-3.3,0.0)  | 0.045   | -7.5                             | (-10.8,-4.2) | <.0001  | -11.7    | (-15.0,-8.3) | <.0001  |
| <b>Year</b>                                                      | 1.3       | (1.1,1.6)   | <.0001  | 0.4                              | (-0.1,0.9)   | 0.121   | 0.5      | (0.0,1.0)    | 0.072   |
| <b>Conflict Type 1*time</b>                                      | --        |             | --      | 0.9                              | (0.3,1.5)    | 0.005   | 1.0      | (0.3,1.6)    | 0.003   |
| <b>Conflict Type 2*time</b>                                      | --        |             | --      | 1.2                              | (0.6,1.8)    | <.0001  | 1.2      | (0.6,1.8)    | <.0001  |
| <b>Patient volume (10,000s)</b>                                  | <0.1      | (-0.1,0.0)  | 0.229   |                                  |              |         | <0.1     | (-0.1,0.0)   | 0.143   |
| <b>Facility Type</b>                                             |           |             |         |                                  |              |         |          |              |         |
| BHC                                                              | ref       |             |         |                                  |              |         | ref.     |              |         |
| CHC                                                              | -0.1      | (-1.4,1.3)  | 0.936   |                                  |              |         | <0.1     | (-1.3,1.3)   | 0.99    |
| Subcenter                                                        | -5.4      | (-6.8,-4.1) | <.0001  |                                  |              |         | -5.1     | (-6.4,-3.9)  | <.0001  |
| <b>Distance of facility in KM from provincial center (1000s)</b> | -3.7      | (-7.4,0.1)  | 0.055   |                                  |              |         | -1.4     | (-5.1,2.2)   | 0.436   |
| <b>Region</b>                                                    |           |             |         |                                  |              |         |          |              |         |
| Central                                                          | ref       |             |         |                                  |              |         | ref.     |              |         |
| Central Highlands                                                | 1.4       | (-1.0,3.8)  | 0.262   |                                  |              |         | 1.7      | (-0.8,4.1)   | 0.187   |
| East                                                             | -1.9      | (-3.8,0.1)  | 0.06    |                                  |              |         | -2.6     | (-4.7,-0.5)  | 0.013   |
| North                                                            | 0.5       | (-1.5,2.6)  | 0.596   |                                  |              |         | 0.8      | (-1.2,2.8)   | 0.44    |
| North East                                                       | -0.3      | (-2.2,1.6)  | 0.776   |                                  |              |         | -0.7     | (-2.7,1.4)   | 0.53    |
| South                                                            | -5.8      | (-7.8,-3.9) | <.0001  |                                  |              |         | -6.4     | (-8.4,-4.4)  | <.0001  |
| South East                                                       | 4.7       | (2.5,6.8)   | <.0001  |                                  |              |         | 5.4      | (3.1,7.6)    | <.0001  |
| West                                                             | -3.3      | (-5.2,-1.4) | 0.001   |                                  |              |         | -3.3     | (-5.1,-1.5)  | <.0001  |
| <b>Province Type</b>                                             |           |             |         |                                  |              |         |          |              |         |



|                 |      |            |       |  |  |  |      |           |      |
|-----------------|------|------------|-------|--|--|--|------|-----------|------|
| Contracting In  | ref. |            |       |  |  |  | ref. |           |      |
| Contracting Out | <0.1 | (-2.0,2.0) | 0.983 |  |  |  | 3.2  | (0.9,5.5) | 0.01 |

**eFigure 1. Average Annual Percentage Point Change in Composite Coverage Index vs Conflict by Province**

**A, 2003-2010**

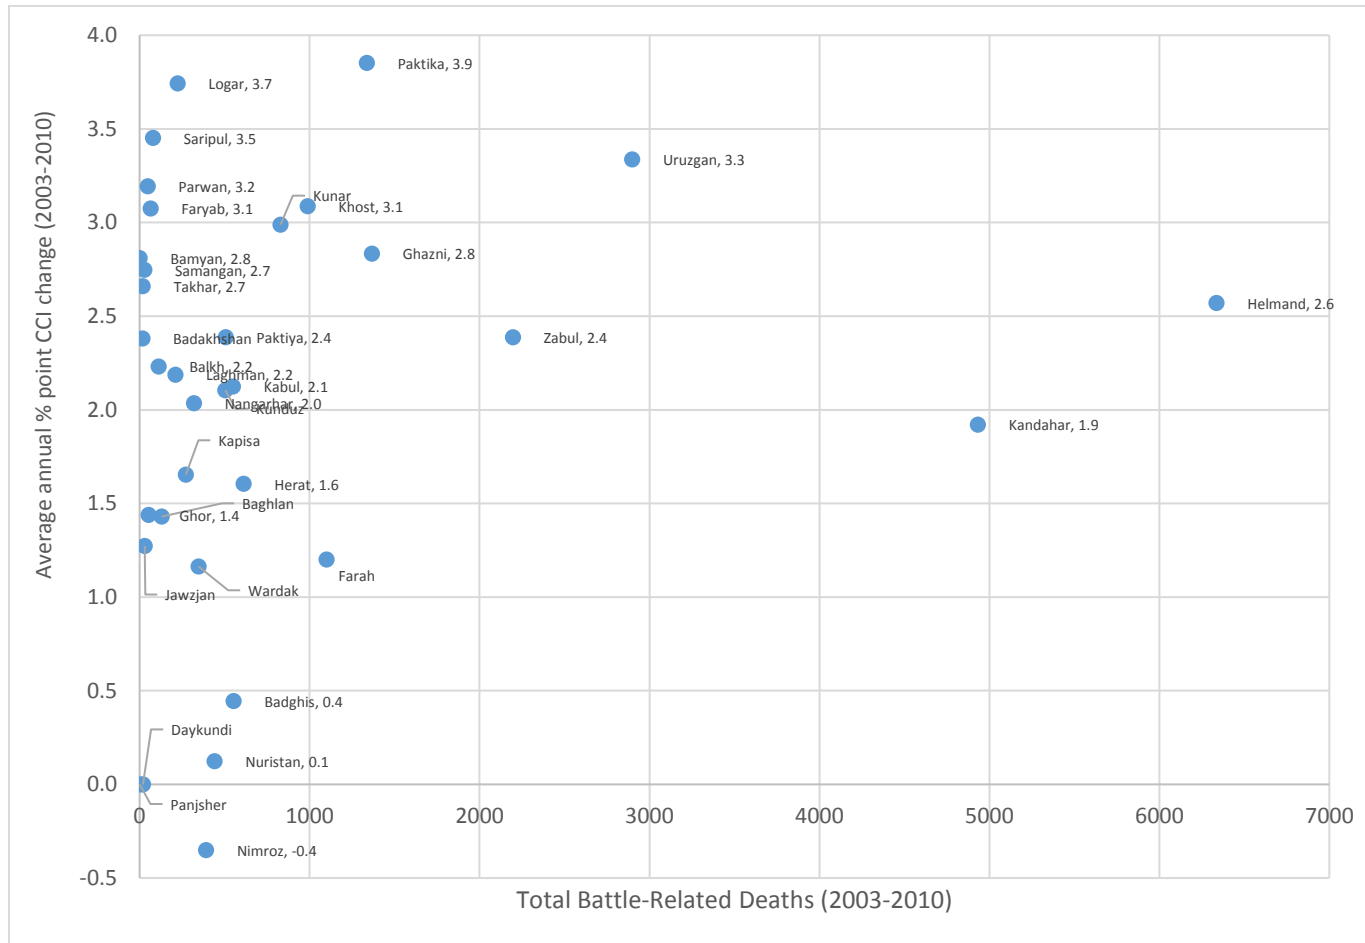

**B, 2010-2017**

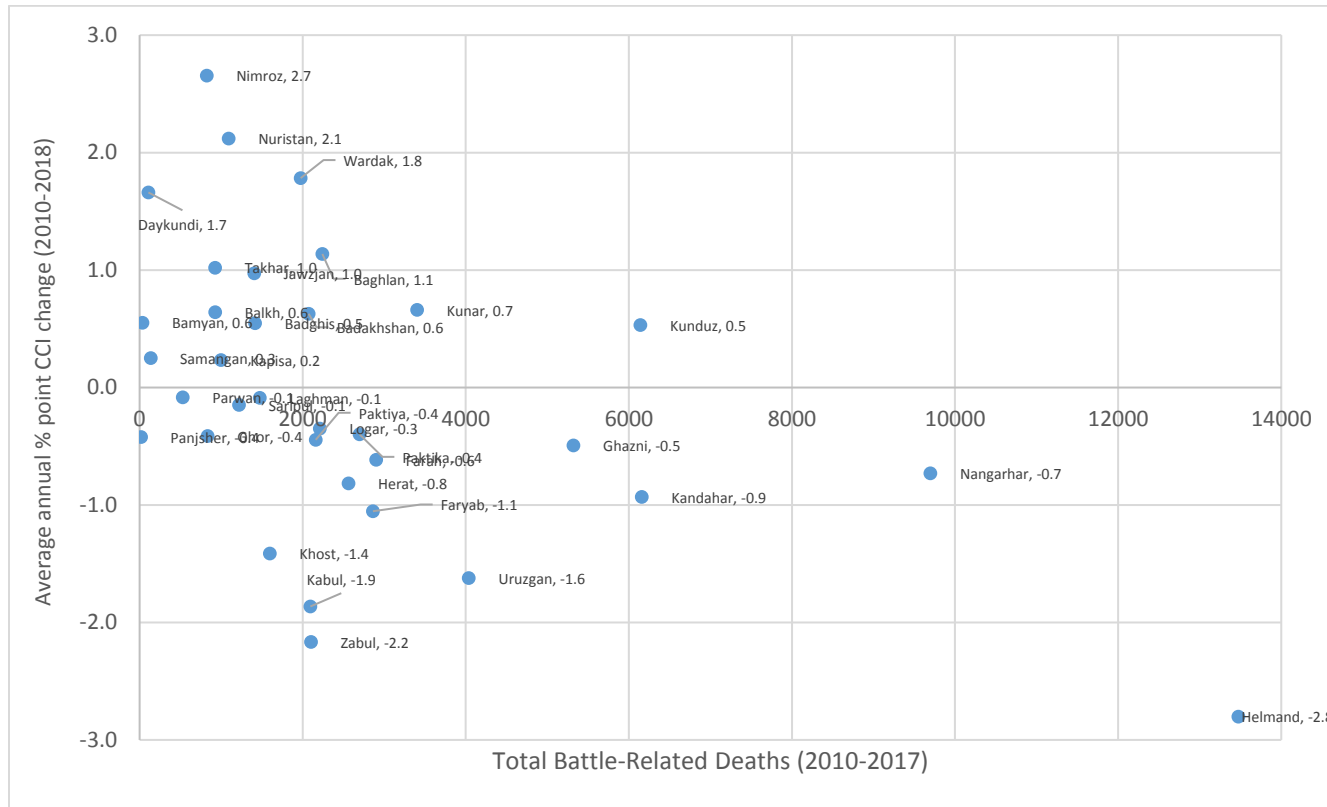

## eFigure 2. Crude and Multivariable Analysis of Conflict Association With RMNCH Coverage

### A, 2003-2010

\* Crude means over time

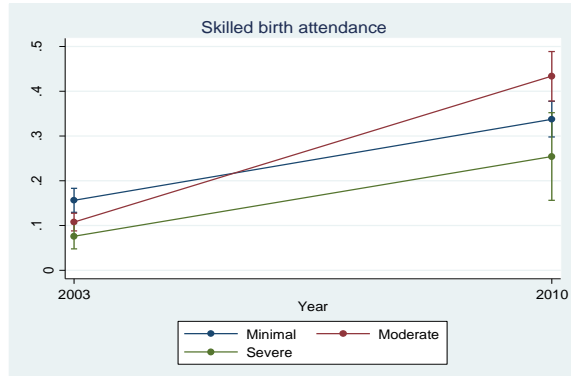

\* Adjusted means over time

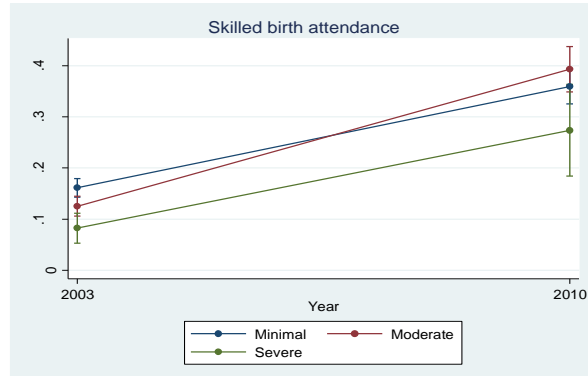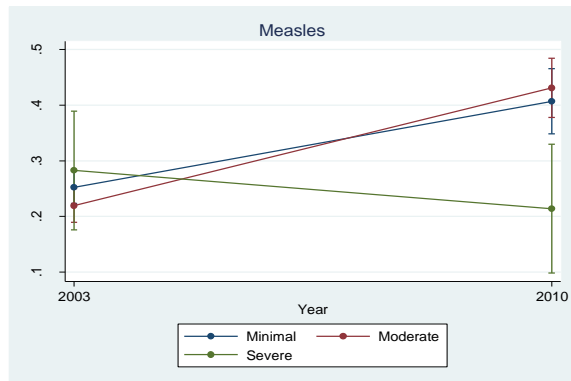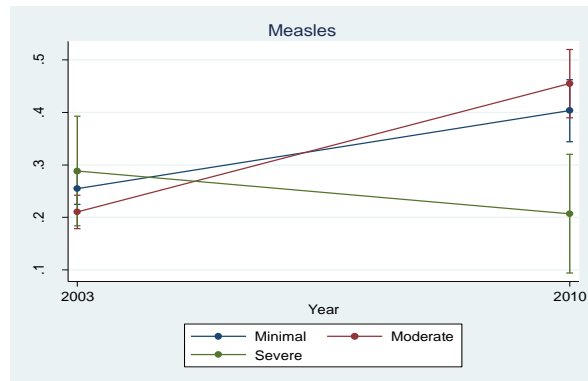

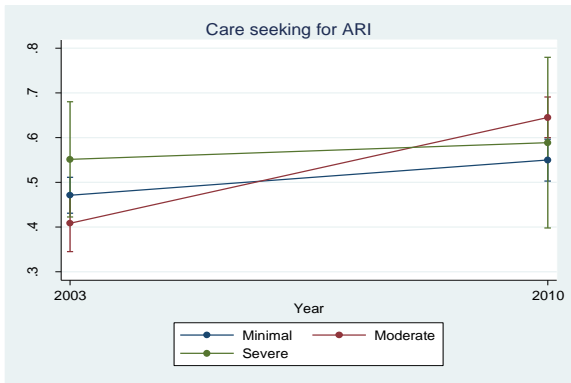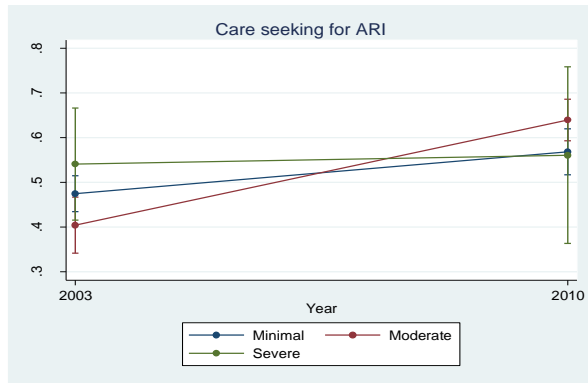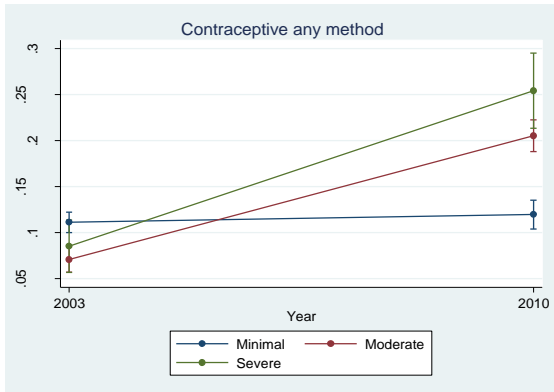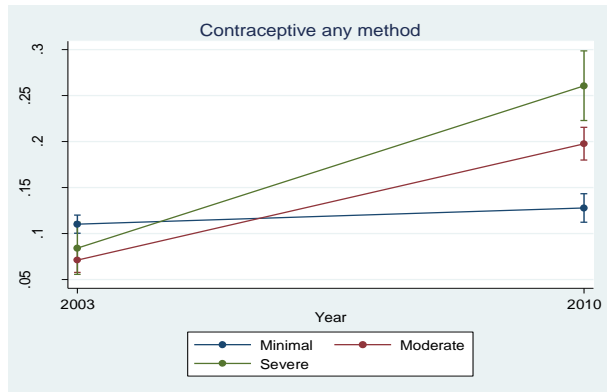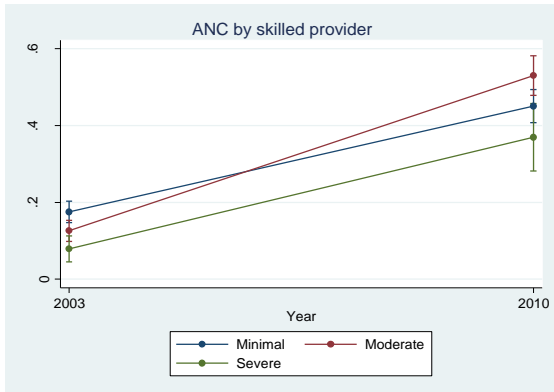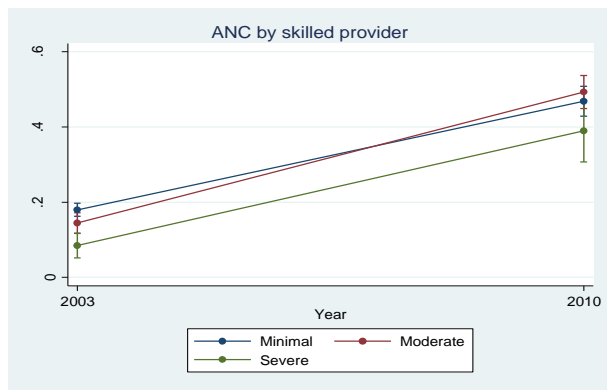

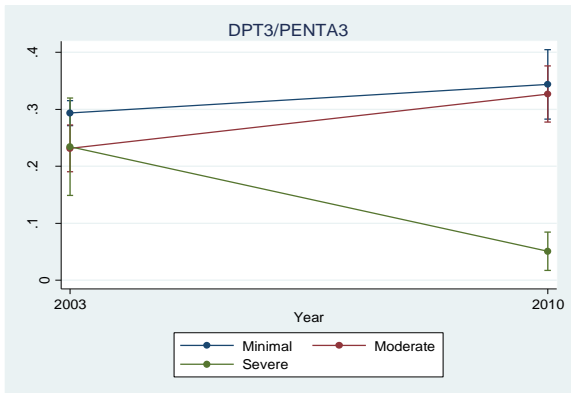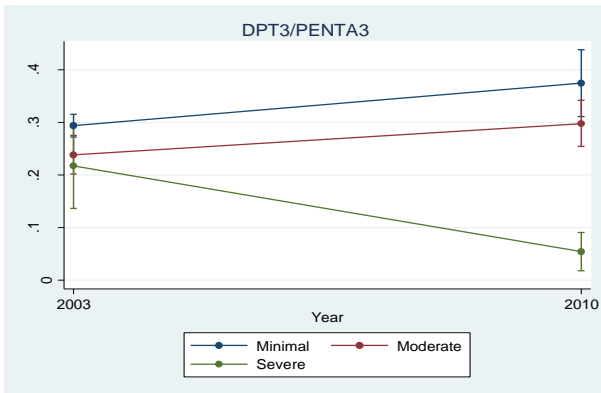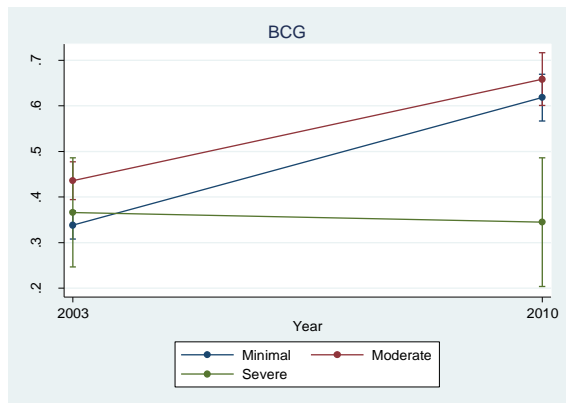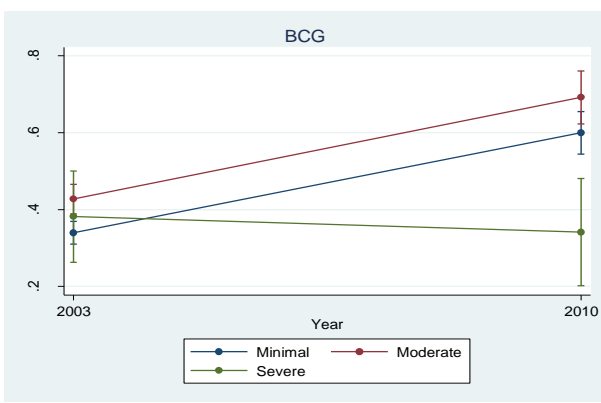

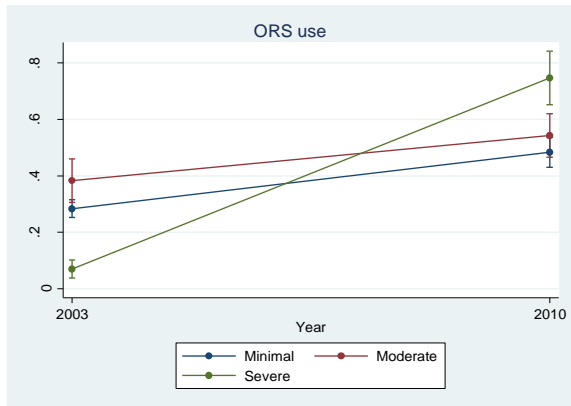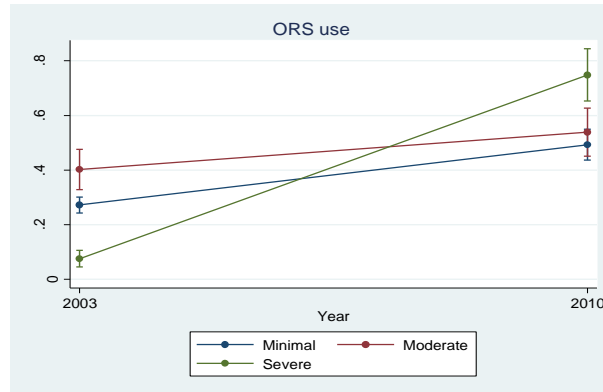

**B, 2010-2018**

\*Unadjusted trends over time

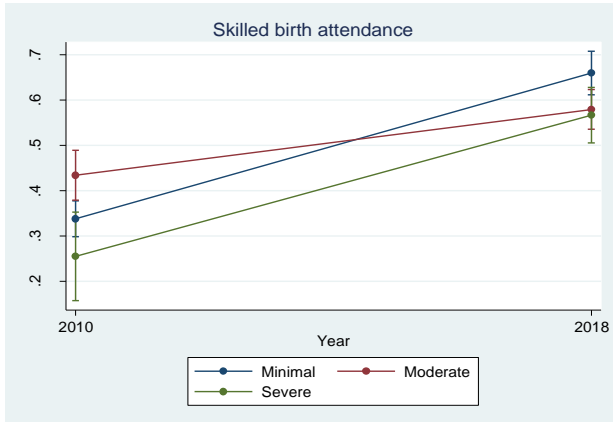

\*Covariate adjusted means over time

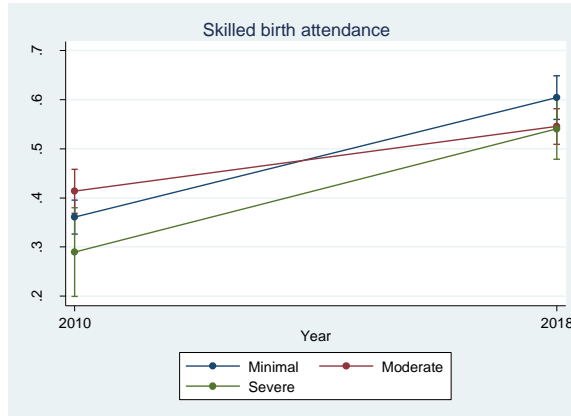

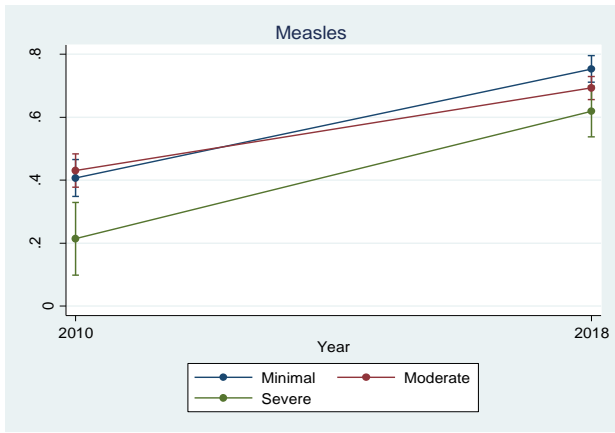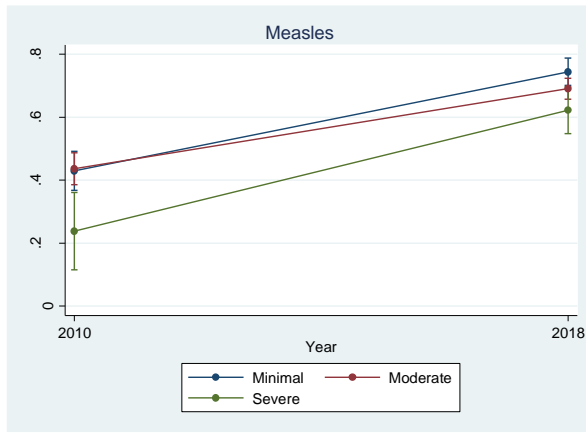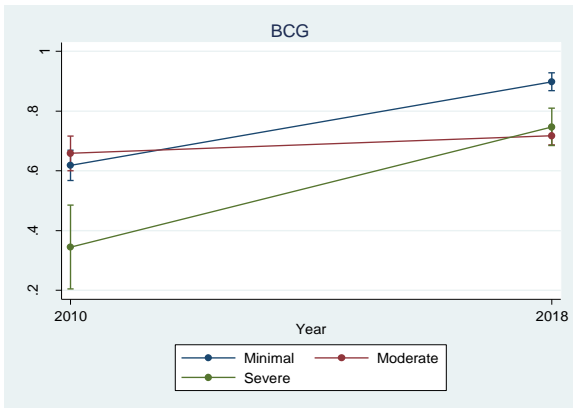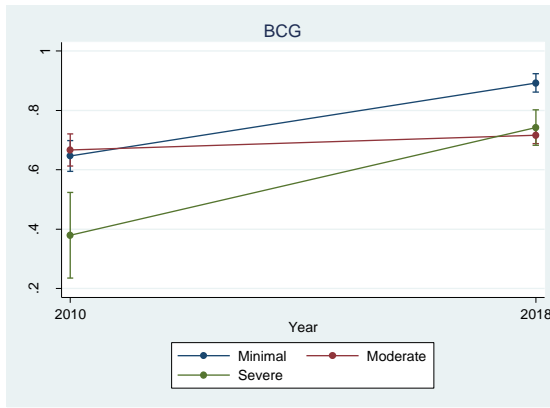



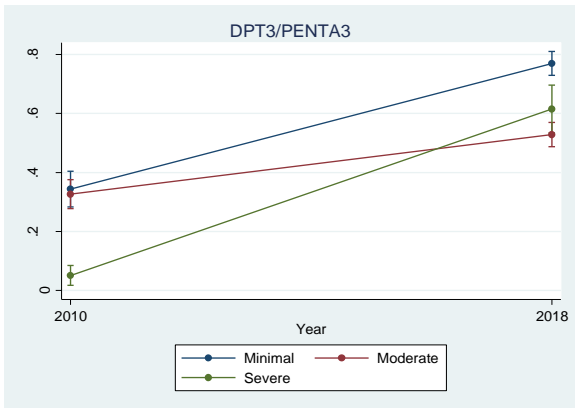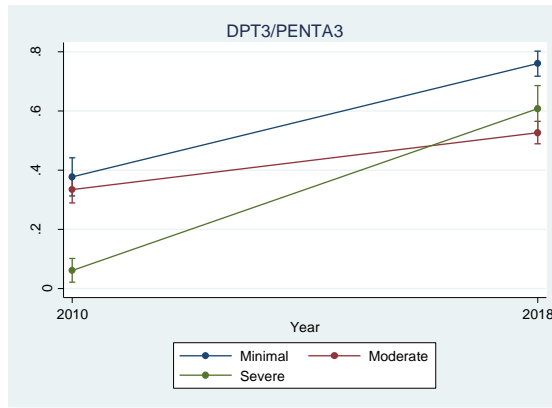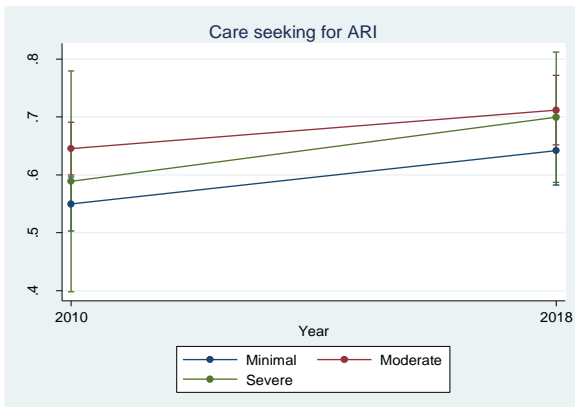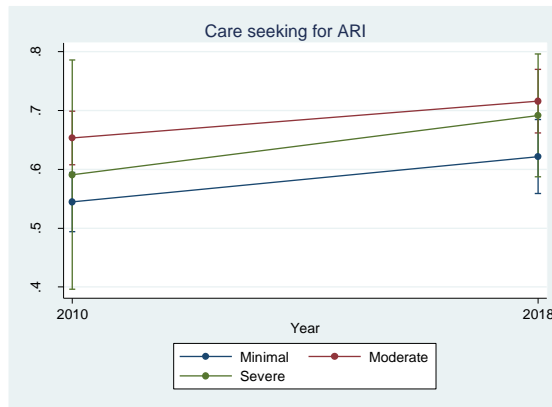

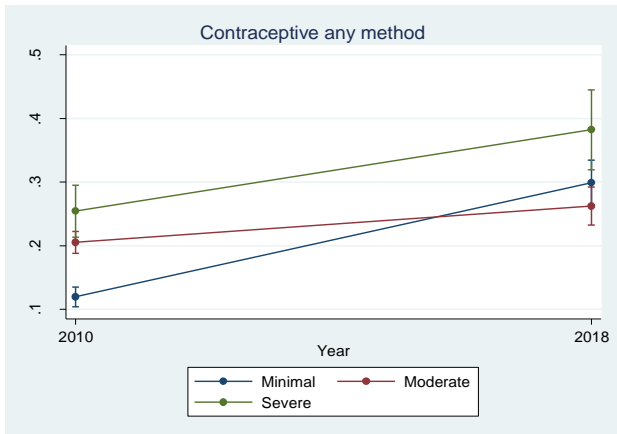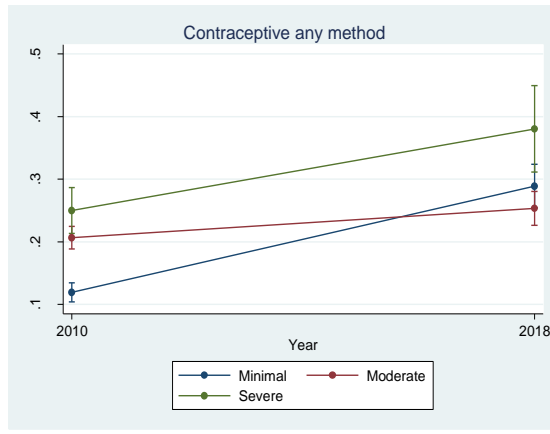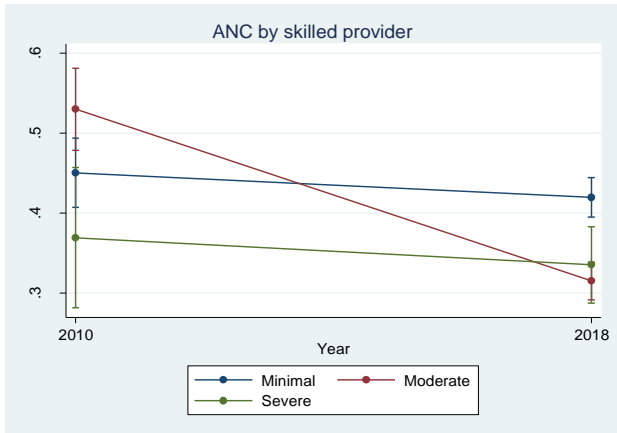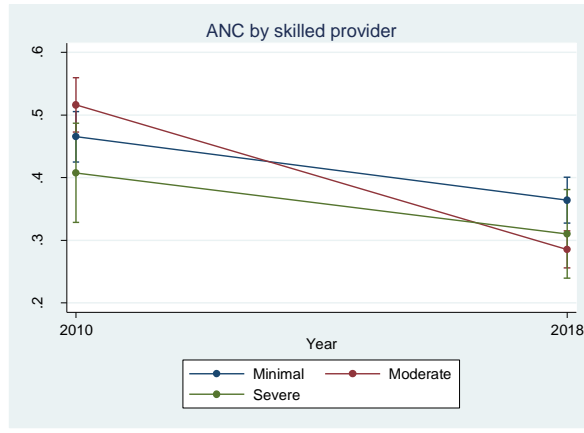

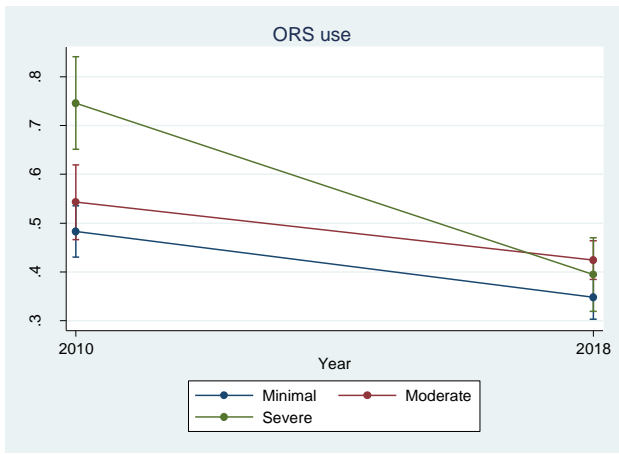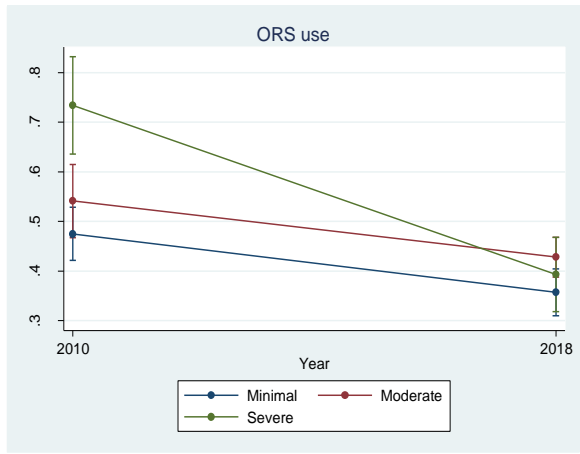

**eFigure 3. Health System Overall Mean Scores and Change by Province**  
**A. 2004-2010**

Note: A single point is presented for provinces with an estimate for only that year. The vertical line between them represents percentage point change between years.

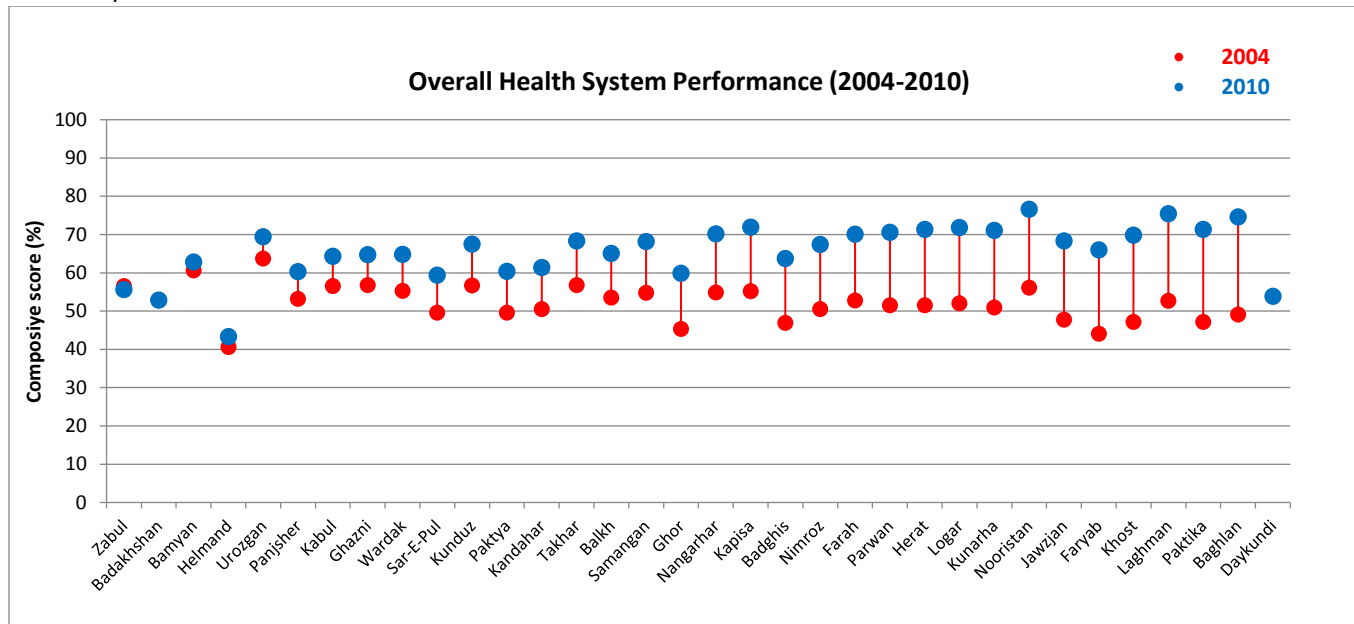

**B, 2011-2016**

Note: A single point is presented for provinces with an estimate for only that year. The vertical line between them represents percentage point change between years.

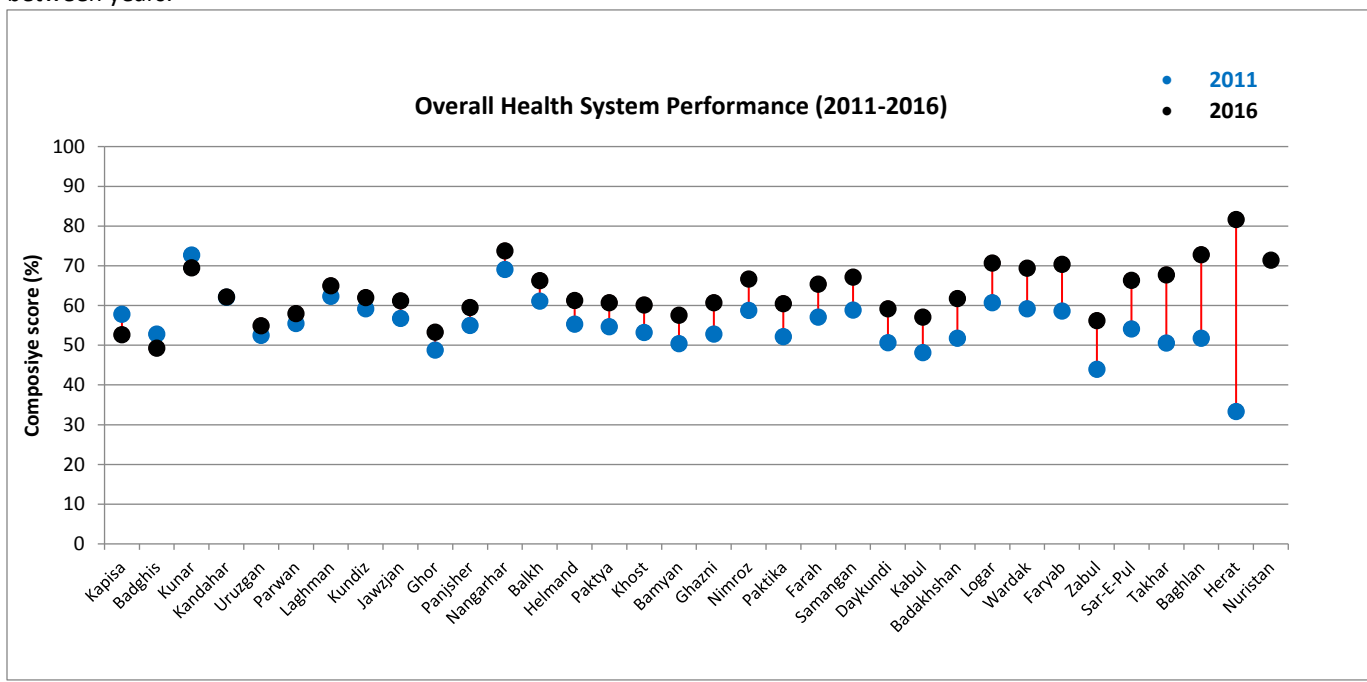

eFigure 4. Average Annual Percentage Point Change in Overall Health Systems Performance vs Conflict by Province

A, 2004-2010

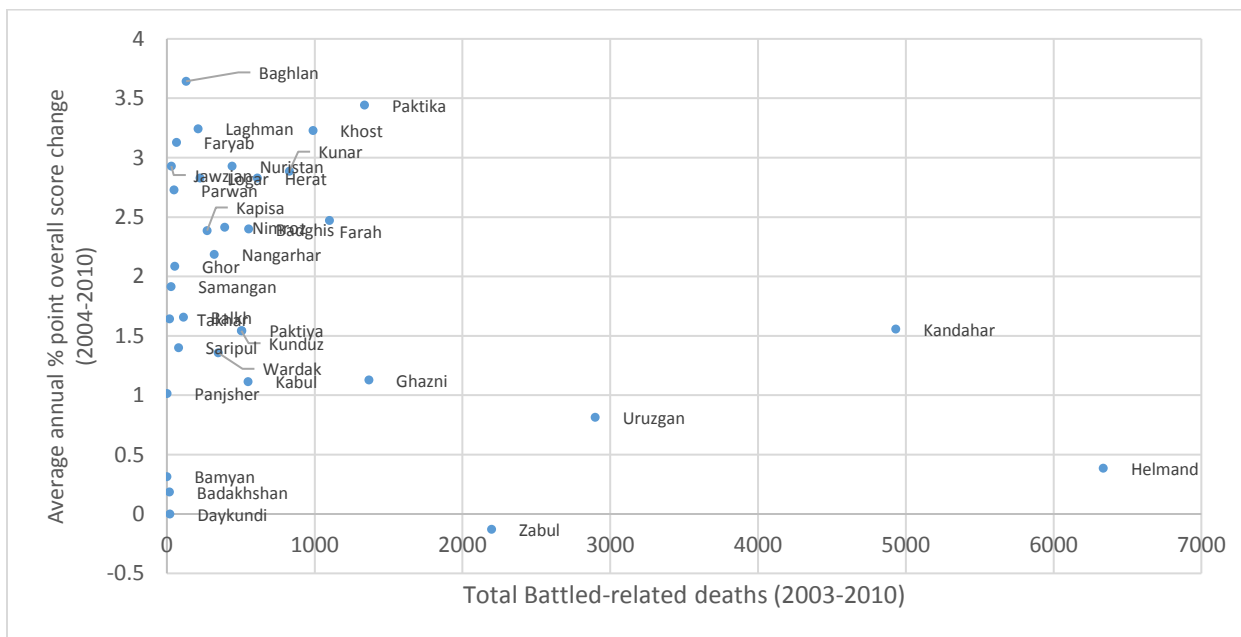

**B, 2011-2016**

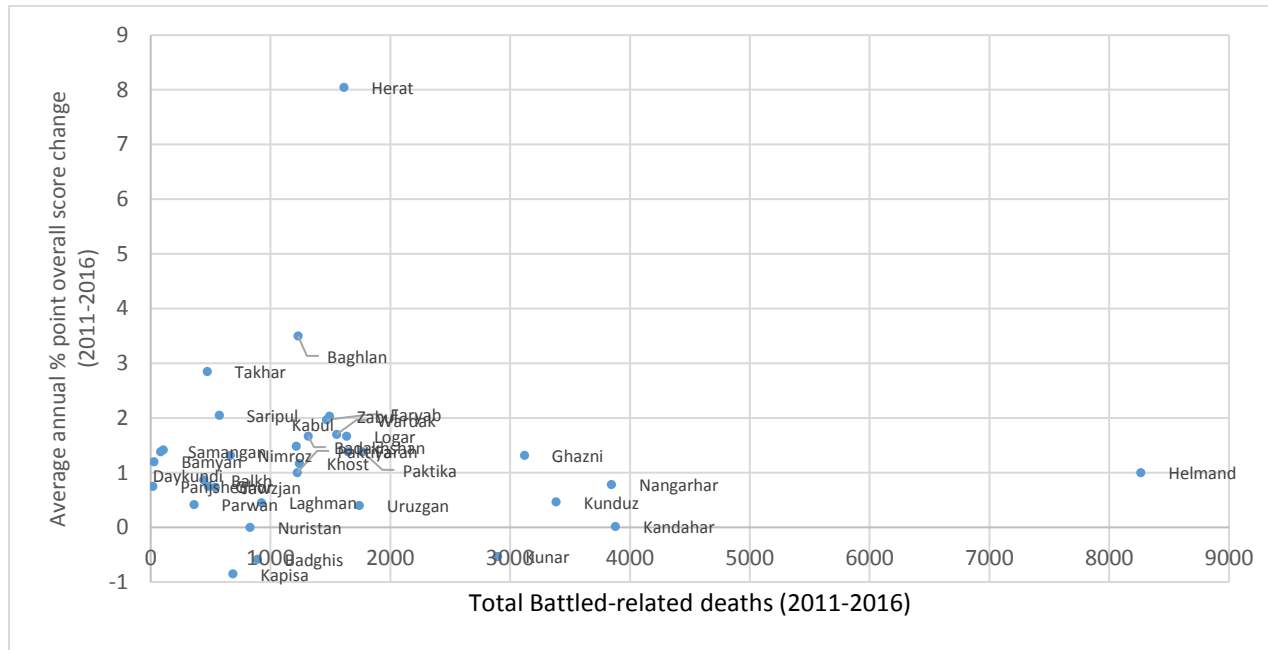

**eFigure 5. Crude and Multivariable Analysis of Conflict Association With Health Systems Indicators A, From 2004-2010**

\*Unadjusted means over time

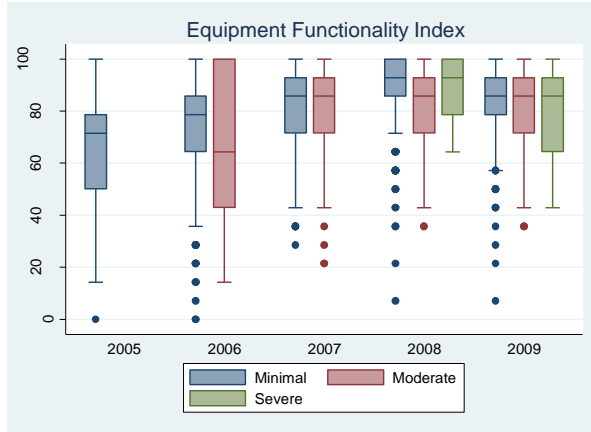

\*Adjusted means over time

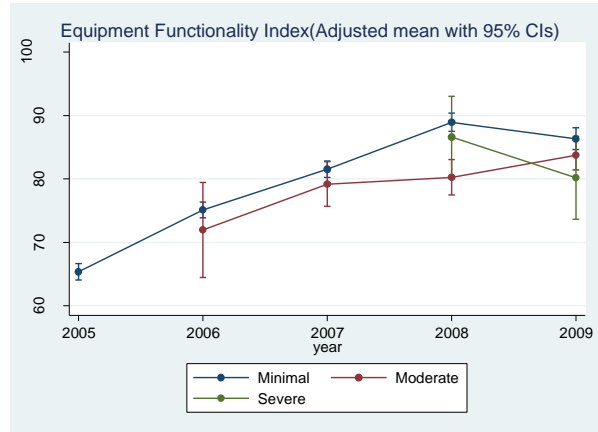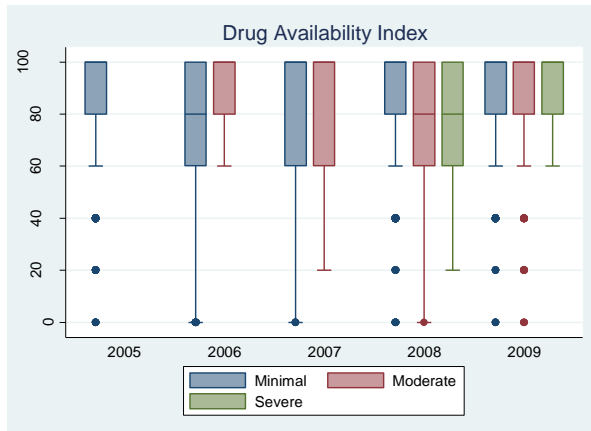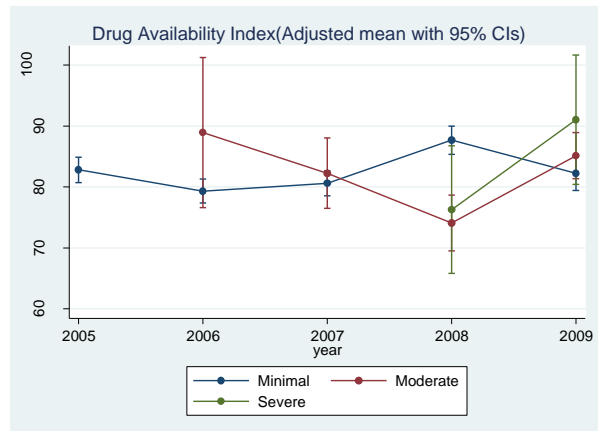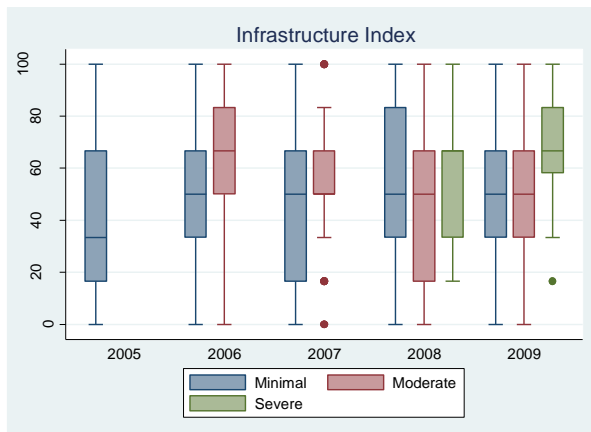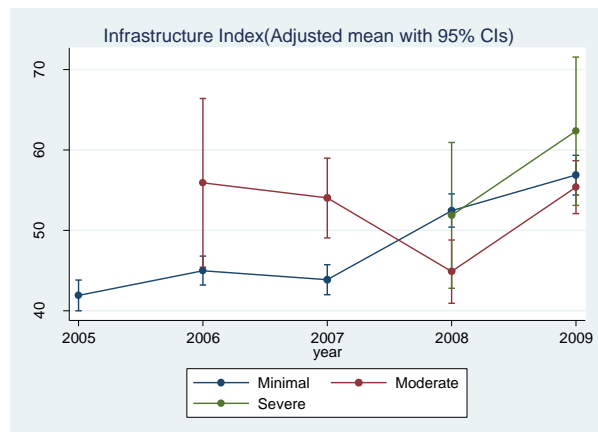

\*Unadjusted means over time

\*Adjusted means over time



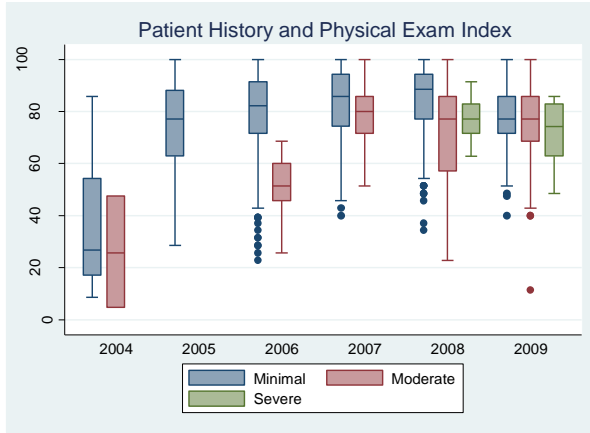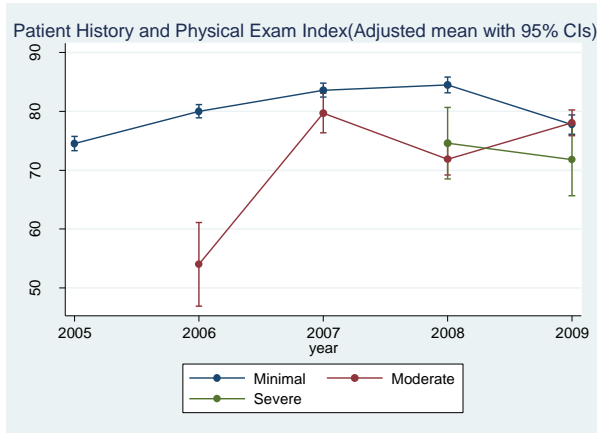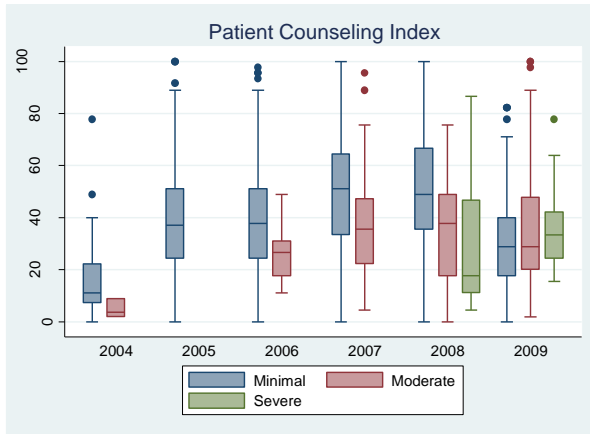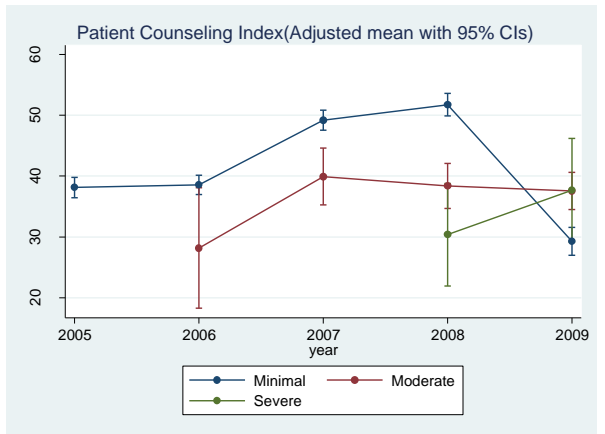

**B, From 2011-2016**

\*Unadjusted means over time

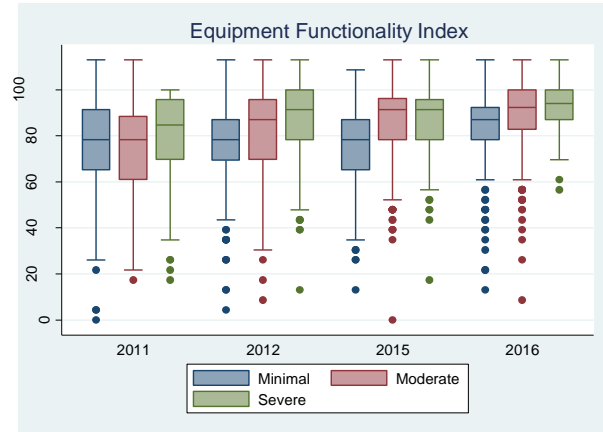

\*Adjusted means over time

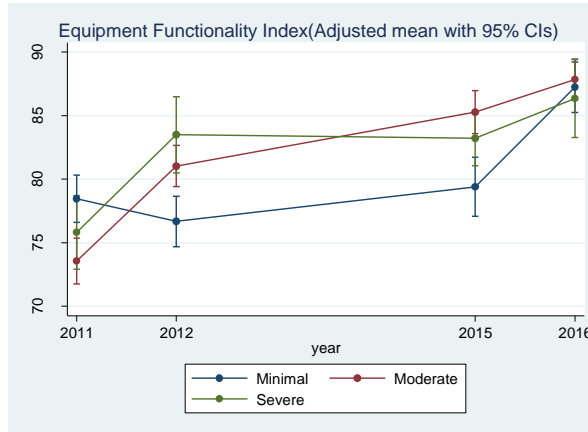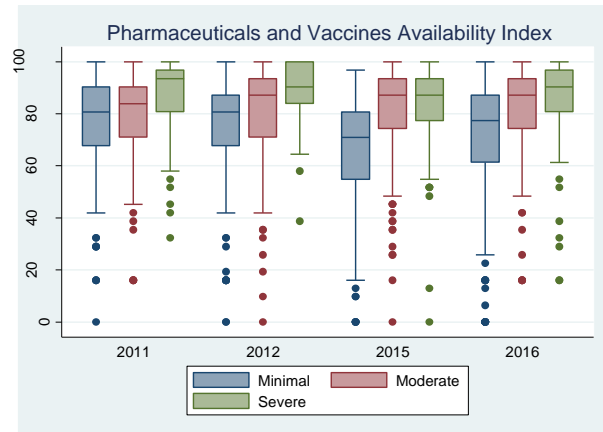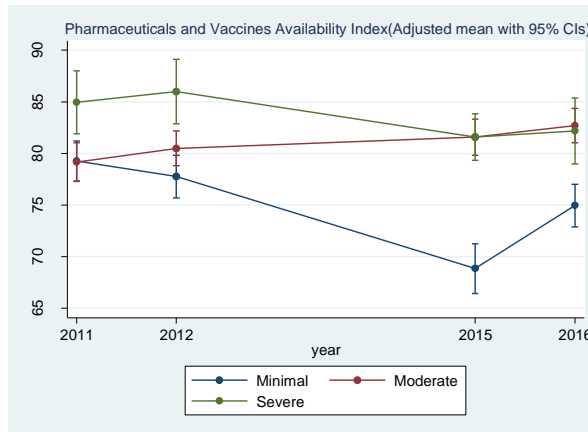

\*Unadjusted means over time

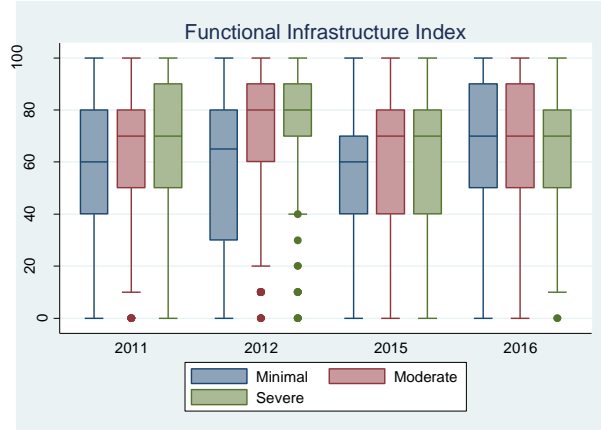

\*Adjusted means over time

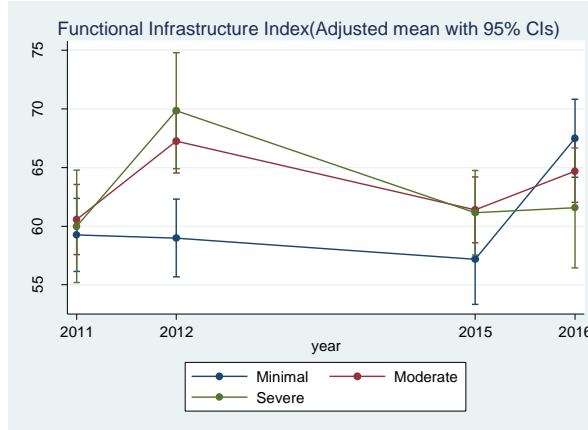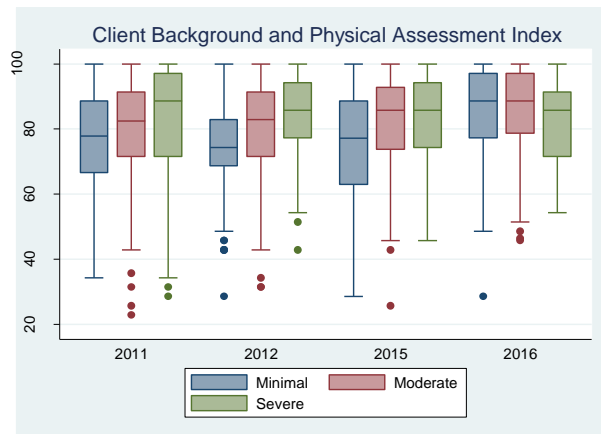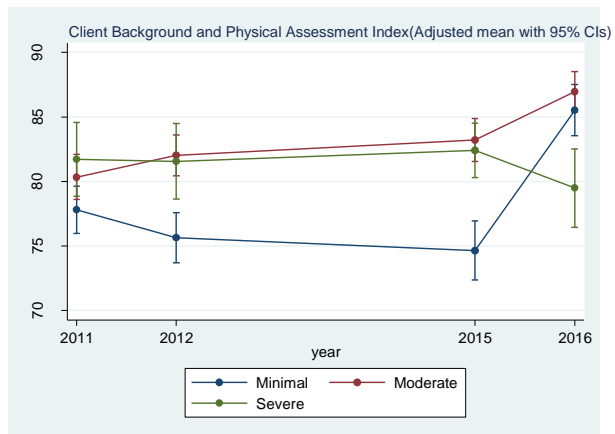

\*Unadjusted means over time

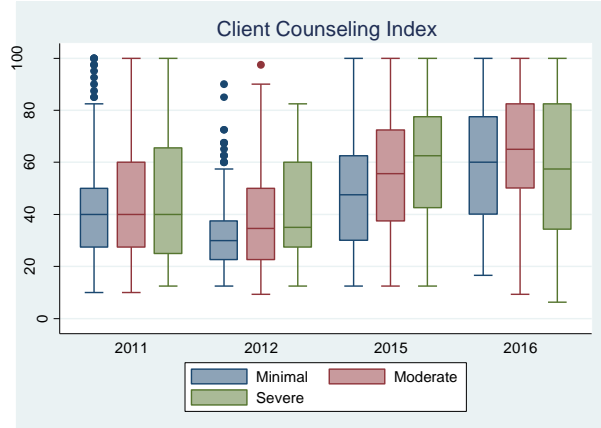

\*Adjusted means over time

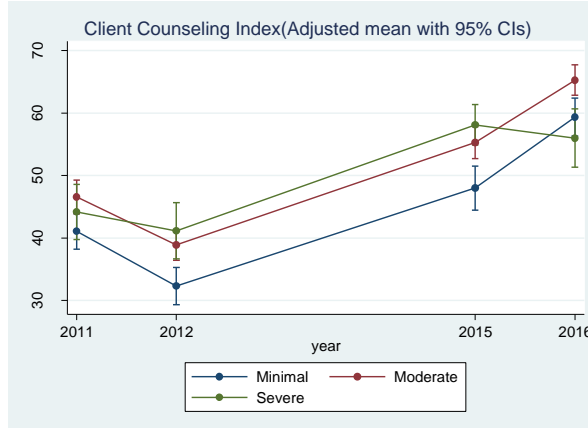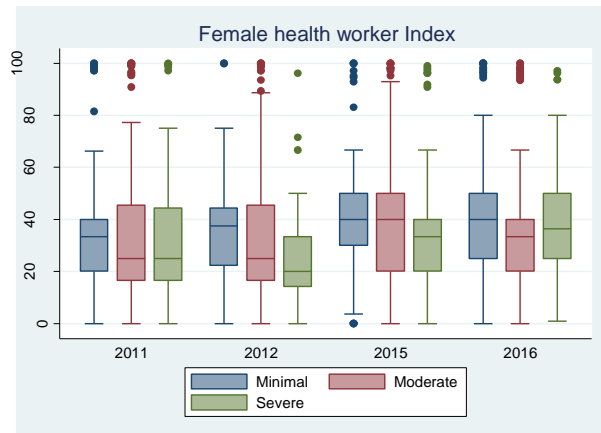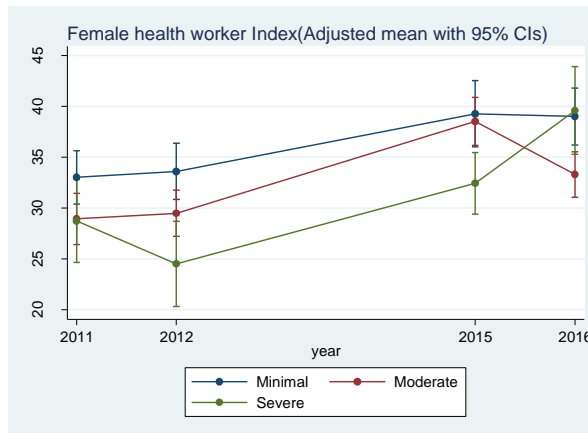

\*Unadjusted means over time

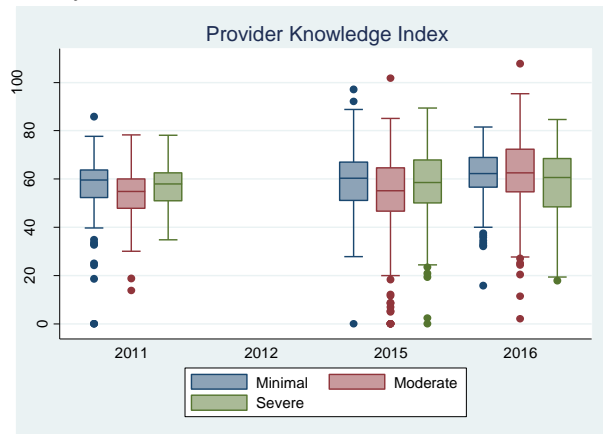

\*Adjusted means over time

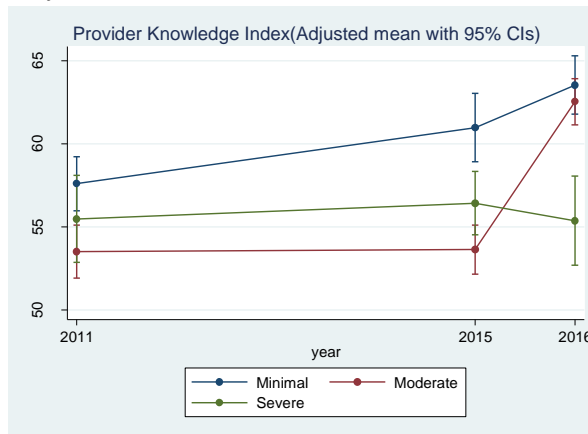

## eReferences.

1. Akseer N, Bhatti Z, Mashal T, et al. Geospatial inequalities and determinants of nutritional status among women and children in Afghanistan: an observational study. *Lancet Glob Heal*. 2018. doi:10.1016/S2214-109X(18)30025-1
2. Golding N, Burstein R, Longbottom J, et al. Mapping under-5 and neonatal mortality in Africa, 2000–15: a baseline analysis for the Sustainable Development Goals. *Lancet*. 2017. doi:10.1016/S0140-6736(17)31758-0
3. Black RE, Allen LH, Bhutta ZA, et al. Maternal and child undernutrition: global and regional exposures and health consequences. *Lancet*. 2008. doi:10.1016/S0140-6736(07)61690-0
